# Supplementary material for: Functional high-throughput screen identifies microRNAs that promote butyrate-induced death in colorectal cancer cells
Source: PubMed Central journal article supplement — Mol Ther Nucleic Acids. 2022 Aug 29;30:30–47. doi: 10.1016/j.omtn.2022.08.037 (PMC9485215; doi:10.1016/j.omtn.2022.08.037), 2022-08-29
Supplement: mmc2.pdf [file mmc2.pdf]

# Functional high-throughput screen identifies microRNAs that promote butyrate-induced death in colorectal cancer cells

Saira R. Ali,<sup>1</sup> Karen J. Humphreys,<sup>1</sup> Kaylene.J. Simpson,<sup>3,4</sup> Ross A. McKinnon,<sup>1</sup> Robyn Meech,<sup>1</sup> and Michael Z. Michael<sup>1,2</sup>

<sup>1</sup>Flinders Health and Medical Research Institute – Cancer Program, Flinders University, Flinders Medical Centre, Bedford Park, SA 5042, Australia; <sup>2</sup>Department of Gastroenterology and Hepatology, Flinders Medical Centre, Bedford Park, SA 5042, Australia; <sup>3</sup>Victorian Centre for Functional Genomics, Peter MacCallum Cancer Centre, Melbourne, VIC 3000, Australia; <sup>4</sup>Sir Peter MacCallum Department of Oncology, University of Melbourne, Parkville, VIC 3050, Australia

**The gut fermentation product butyrate displays anti-cancer properties in the human proximal colon, including the ability to inhibit proliferation and induce apoptosis in colorectal cancer (CRC) cells. A natural histone deacetylase inhibitor (HDACi), butyrate can alter histone acetylation patterns in CRC cells, and thereby regulate global gene expression, including the non-coding transcriptome and microRNAs (miRNAs). Dysregulated miRNA expression affects CRC development and progression; however, the interplay between miRNA activity and butyrate response remains to be elucidated. A high-throughput functional screen was employed to identify miRNAs that can act as enhancers of the anti-cancer properties of butyrate. Validation studies confirmed that several miRNAs, including miR-125b, miR-181a, miR-593, and miR-1227, enhanced apoptosis, decreased proliferation, and promoted cell-cycle arrest in the presence of butyrate. Pathway analyses of predicted miRNA target genes highlighted their likely involvement in critical cancer-related growth pathways, including WNT and PI3K signaling. Several cancer-associated miRNA targets, including *TRIM29*, *COX2*, *PIK3R3*, *CCND1*, *MET*, *EEF2K*, *DVL3*, and *NUP62* were synergistically regulated by the combination of cognate miRNAs and butyrate. Overall, this study has exposed the potential of miRNAs to act as enhancers of the anti-cancer effects of HDAC inhibition and identifies specific miRNAs that might be exploited for therapeutic benefit.**

## INTRODUCTION

Colorectal cancer (CRC) is the second most common cause of cancer-related deaths worldwide.<sup>1</sup> A small number of CRC cases are attributed to genetic factors; however, most cases develop sporadically and are associated with environmental factors such as diet.<sup>2</sup> Epigenetic changes, including altered DNA methylation patterns, histone modifications, and aberrant expression of non-coding RNAs, such as microRNAs (miRNAs), play a crucial role in CRC development and progression.<sup>3-5</sup>

The consumption of dietary fiber, particularly resistant starch, has been shown to be beneficial in the gut, in part due to its role in the

microbial production of the chemopreventive molecule butyrate. Butyrate accumulates in the colon at concentrations exceeding 20 mM,<sup>6</sup> where it serves as a primary energy source for normal colonocytes and is a histone deacetylase inhibitor (HDACi) with the ability to maintain healthy colonic epithelial cells by regulating cell growth and differentiation.<sup>7</sup> Paradoxically, butyrate has also been shown to eliminate CRC cells through the inhibition of cell proliferation and promotion of apoptosis and differentiation.<sup>8,9</sup> Butyrate exerts these anti-cancer properties by altering histone acetylation patterns and inducing changes in cell-cycle-related protein-coding and non-coding gene expression, including miRNA expression.<sup>10-12</sup>

miRNAs have been shown to play a vital role in the initiation, progression, and metastasis of many cancers,<sup>13,14</sup> and there is growing interest in the role that miRNAs play in the butyrate-mediated inhibition of CRC cells. miRNAs are endogenous, short non-coding RNAs with the ability to post-transcriptionally regulate gene expression through gene silencing. Butyrate and miRNAs can regulate similar cell growth and death signaling pathways, suggesting that butyrate may mediate its anti-cancer effects partly through miRNA regulation or in collaboration with miRNAs.

miRNA profiling demonstrated that butyrate can modulate the expression of many miRNAs and specific oncogenic miRNA clusters, including the miR-17-92 cluster.<sup>15</sup> The well-known oncogenic cluster, miR-17-92, has a key role in the regulation of proliferation, angiogenesis, differentiation, and apoptosis in CRC, and dysregulation of this cluster can contribute to CRC development and progression.<sup>16,17</sup> Exposure of CRC cells to butyrate reduced expression of miR-17-92 cluster members, including miR-17, miR-18a, miR-19a, miR-20a, miR-19b-1, and miR-92a-1, thereby resulting in increased expression of key tumor-suppressor target genes *PTEN*, *BCL2L11*, and

Received 4 January 2022; accepted 24 August 2022;  
<https://doi.org/10.1016/j.omtn.2022.08.037>.

**Correspondence:** Michael Z. Michael, Flinders Centre for Innovation in Cancer, Flinders Medical Centre, Bedford Park, South Australia, 5042 Australia  
**E-mail:** [michael.michael@flinders.edu.au](mailto:michael.michael@flinders.edu.au)

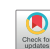

*CDKN1A*.<sup>15,18</sup> Furthermore, miR-18a was shown to enhance the anti-proliferative and pro-apoptotic properties of butyrate when overexpressed in CRC cells, acting counter to other cluster members.<sup>19</sup> Recently, a systems biology approach uncovered a novel butyrate-regulated RNA-interaction network and several miRNAs with the ability to enhance the anti-cancer properties of butyrate in CRC cells.<sup>20</sup>

Previous research indicates an important role for miRNAs in the butyrate response; however, comprehensive understanding of the butyrate-sensitizing capabilities of miRNAs is still lacking. In this study, a high-throughput functional screen was employed to reveal miRNA-mediated enhancement of the anti-cancer properties of butyrate. Validation experiments revealed that several key miRNA:mRNA pairs were involved in the butyrate sensitization of CRC cells through the regulation of crucial cell growth signaling pathways. These data highlight the value of high-throughput approaches in revealing novel molecular interactions involved in the growth and survival of CRC cells. Understanding these interactions may also identify novel therapeutic targets.

## RESULTS

### Systematic identification of butyrate-sensitizing miRNAs in CRC cells

To systematically identify miRNAs with the ability to enhance the anti-cancer properties of butyrate in CRC cells, a high-throughput functional miRNA screen was performed at the Victorian Centre for Functional Genomics (Figure 1). HCT116 cells were transfected with a library of 1,280 miRNA mimics and then cell viability and apoptosis were determined in the presence and absence of butyrate. They were treated with a 2.5 mM sublethal dose of butyrate, which reduces cell proliferation by only 20% over 72 h. This concentration was selected to enable the exploration of miRNAs that enhanced the anti-proliferative properties of butyrate. Reproducibility between screen replicates was good with Pearson correlation coefficients  $r = 0.66, 0.68, 0.86,$  and  $0.76$  for untreated and butyrate-treated viability and apoptosis data, respectively (Figure S1). Fifty-seven miRNA mimics provided a synergistic response with butyrate, as defined by enhancing the butyrate-mediated reduction in proliferation by >25% with a  $Z$  score >2 (see section “materials and methods”). Of the 57 miRNA mimics that reduced proliferation, 13 (~1% hit rate) also had the ability to enhance the pro-apoptotic effects of butyrate and were hence selected for further validation (Table S1).

### miRNAs enhance the anti-proliferative effects of butyrate in HCT116 CRC cells

The ability of the 13 selected miRNA mimics to enhance the effect of butyrate on CRC cell proliferation was validated using an xCelligence real-time cell analysis system (Figure 2). Butyrate treatment alone reduced HCT116 cell proliferation by approximately 2-fold compared with untreated cells in the negative control (NC) transfection condition. A subset of miRNA mimics including miR-29b, -125b, -181a, -509, -593, -1227, -1265, -3151, and -4252 significantly reduced

cell proliferation alone, i.e., in the absence of butyrate (Figures 2A–2F, 2I, 2J, and 2M). In contrast, miR-1231, -1256, -3179, and -3654 had no significant effect on cell proliferation in the absence of butyrate (Figures 2G, 2H, 2K, and 2L). All 13 miRNA mimics significantly decreased proliferation in combination with butyrate, consistent with screen results. Based on the coefficient of drug interaction (CDI) values (Table S2), nine out of 13 miRNAs displayed significantly synergistic behavior when combined with butyrate; these were miR-29b, -125b, -181a, -509, -1227, -1256, -1265, -3179, and -3654. The remaining four miRNAs (miR-593, -1231, -3151, and -4252) also had an apparent synergistic effect, but their CDI values were not statistically significant. Of these miRNAs, none had an additive or antagonistic effect when combined with butyrate.

### miRNAs induce apoptosis in combination with butyrate

The ability of the 13 selected miRNA mimics to enhance the effect of butyrate on CRC cell apoptosis was validated using a live-cell imaging system (Incucyte FLR) to detect changes in caspase activity (Figure 3). Butyrate alone increased the proportion of apoptotic cells by over 2-fold compared with untreated NC transfected controls. Of the 13 miRNAs mimics individually transfected into HCT116 cells, seven significantly induced apoptosis alone; i.e., in the absence of butyrate. These were miR-125b, -593, -1227, -1231, -1265, -3179, and -4252 (Figures 3B, 3E–3G, 3I, 3K, and 3M). The remaining six mimics had little effect alone. Eleven individual miRNA mimics promoted apoptosis in combination with butyrate; these were miR-29b, -125b, -181a, -509, -593, -1227, -1231, -1256, -1265, -3179, and -4252 (Figures 3A–3I, 3K, and 3M). There was no significant combinatorial effect for miR-3151 or -3654.

### Selecting miRNA mimics for validation

The CDI values for miRNA-butyrate combinations in proliferation assays were used to refine the hit list for further validation. miR-1227 had the lowest CDI value at 0.19, followed by miR-125b at 0.40 and miR-181a at 0.43 (Table S2). Accordingly, these miRNAs were prioritized for further analysis. The three miRNAs are expressed in the colorectum in both normal and adenocarcinoma tissues (Figure S3). Although miR-593 was not considered synergistic with butyrate, nor was it identified in the TCGA RNA-seq dataset; alone it had the most potent ability to decrease growth when comparing miRNA transfected cells to NC transfected controls (Figure 2E). Based on this potent anti-proliferative effect, miR-593 was also selected for further characterization.

### Butyrate-sensitizing miRNAs regulate cell viability and death in CRC cells

To further explore the ability of miRNAs and butyrate to regulate cell viability and programmed cell death, these changes were examined using flow cytometry. In the absence of butyrate, the miRNA mimics showed no significant effect on the percentage of viable cells (Figure 4A), in contrast to observations from the real-time cell analyses. However, when comparing miRNA with NC transfection conditions in combination with butyrate treatment, miR-125b, miR-593, and miR-1227 were found to significantly enhance the ability of butyrate

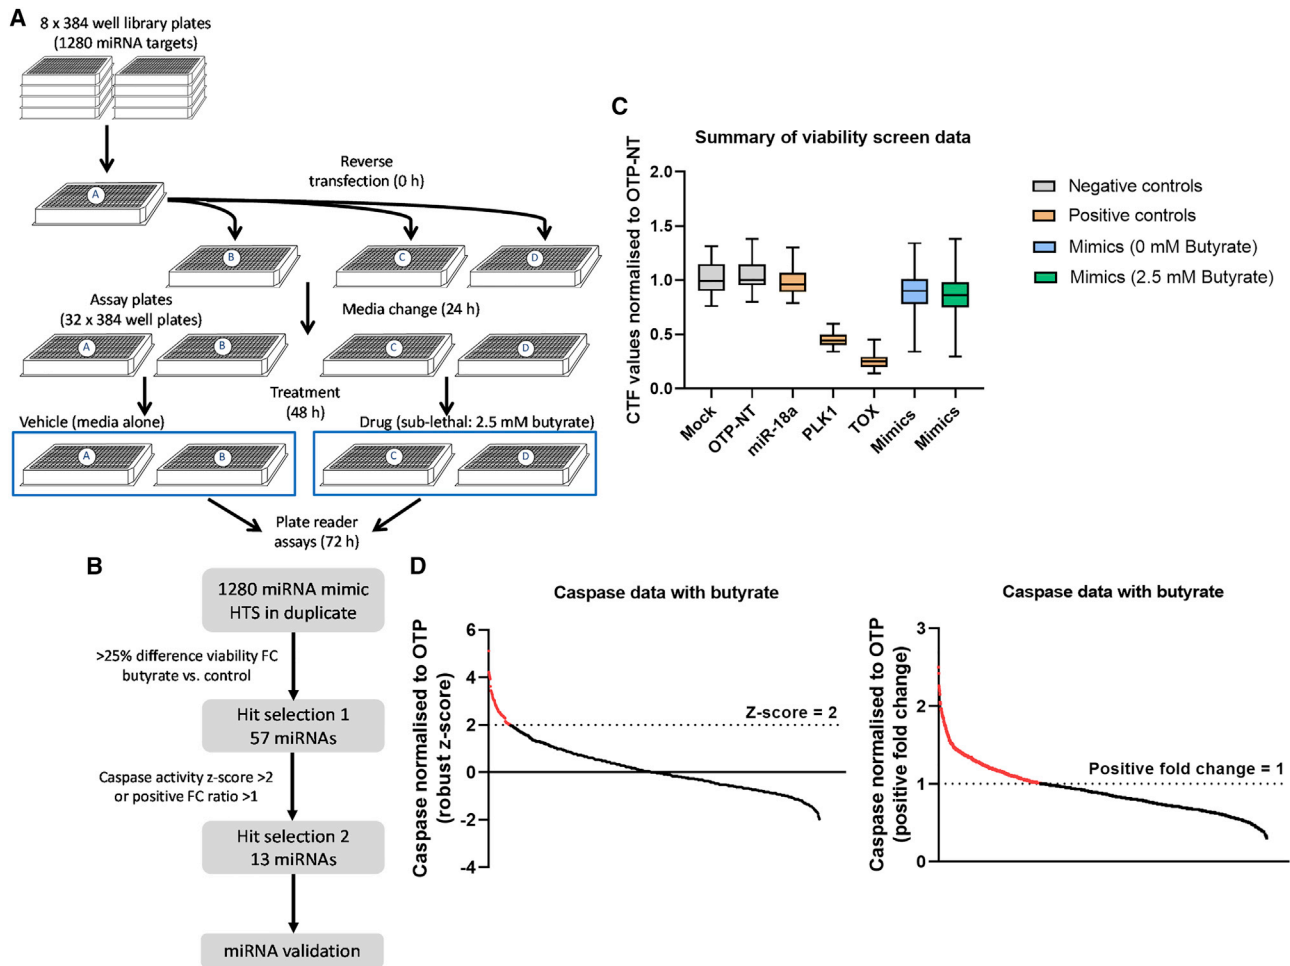

**Figure 1. Unbiased high-throughput functional screen in CRC cells**

(A) Functional miRNA screen experimental workflow. Library plates containing 1,280 miRNA mimics were distributed to A plates. An individual A plate was used to transfer miRNA mimics, DharmaFECT 2 lipid and Opti-MEM to corresponding B, C, and D plates during reverse transfection at 0 h. A medium change was performed at 24 h, followed by 2.5 mM butyrate treatment at 48 h to plates C and D. The ApoLive-Glo Multiplex assay for proliferation and apoptosis was performed at 72 h post transfection. A summary of the screen results in HCT116 cells. (B) Flow chart of screen hit selection criteria. (C) The y axis indicates cell titer fluor (CTF) values normalized to the NC (OTP-NT) and the x axis indicates NCs (mock, ON-TARGETplus [OTP-NT]), positive mimic control (miR-18a), and positive death controls (siPLK1, siTOX). (D) The y axis indicates caspase activity normalized to OTP-NT and the x axis indicates individual mimics, either Z score or positive fold change.

to reduce the fraction of viable cells (Figures 4A and S2). When examining apoptosis at early and late stages, only miR-593 induced apoptosis alone (in the absence of butyrate), but this was only significant at the early apoptosis stage. Both miR-593 and miR-1227 significantly enhanced the pro-apoptotic activity of butyrate when assessed at both the early and late stages. miR-125b also enhanced the pro-apoptotic effect of butyrate when assessed at the late stage. Overall, these data are broadly consistent with data generated using the real-time cell analysis platforms, and further support the synergistic effects of selected miRNAs with butyrate.

CRC cell lines display considerable functional heterogeneity in part due to different driver mutations, thus it was important to test the activities of butyrate-sensitizing miRNAs in a second cell line with a

different mutational status. HCT116 cells harbor wild-type (WT) *TP53* and *BRAF* genes, and mutant *CTNNB1*, *PIK3CA*, and *KRAS*.<sup>21</sup> Alternatively, LIM1215 cells contain WT *PIK3CA*, *KRAS*, *BRAF*, and *TP53* and mutant *CTNNB1*.<sup>22</sup> A normal human foreskin fibroblast cell line (HFF) was used to assess the effects of miRNAs and butyrate on survival of noncancerous cells.

Butyrate alone reduced LIM1215 cell viability by approximately 20% and induced an approximately 2-fold increase in the number of apoptotic cells (Figures S4A and S4B). All miRNAs, except miR-125b, were able to reduce cell viability independently of butyrate, with miR-181a showing the greatest effect. All miRNAs also induced apoptosis in the absence of butyrate. All miRNAs, except miR-125b, enhanced the ability of butyrate to reduce cell viability. miR-1227 had

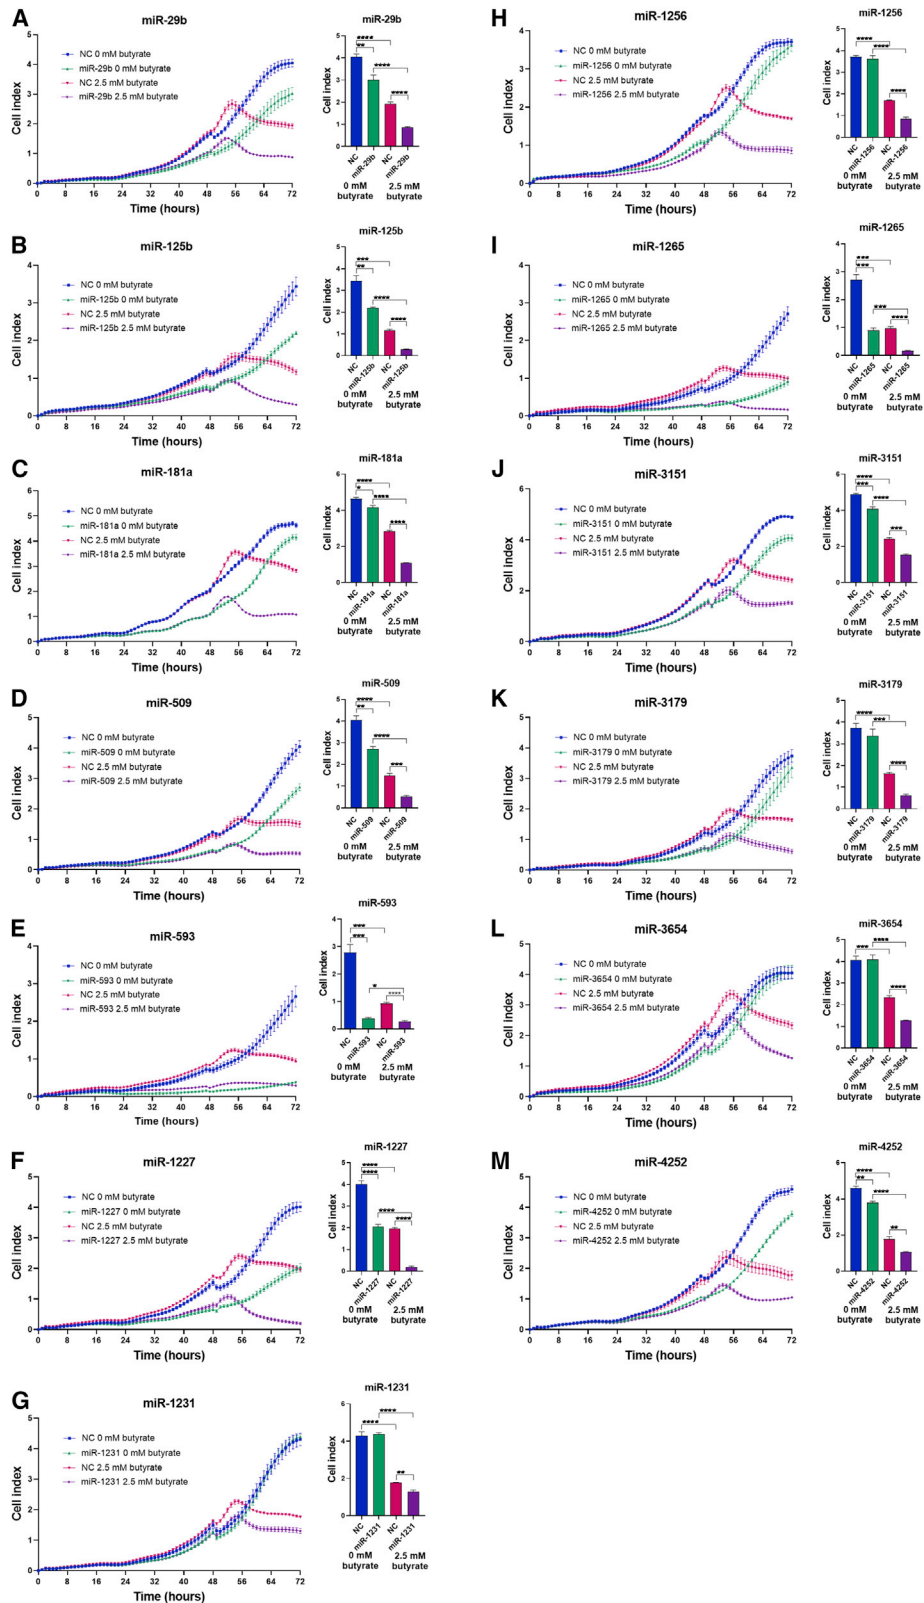

(legend on next page)



the greatest ability to sensitize CRC cells to butyrate. Overall, these effects are generally consistent with those observed in HCT116 cells.

HFF cell viability was not significantly reduced by any miRNA mimic or by butyrate, alone or in combination. Unexpectedly, the combination of miR-1227 and butyrate slightly but significantly increased viable HFF cells (Figure S4C). All miRNAs alone significantly increased HFF apoptosis, but butyrate had little or no modulatory effect on this response (Figure S4D).

#### Butyrate-sensitizing miRNAs modulate the cell cycle in CRC cells

miRNAs were further investigated for their effects on the cell cycle, alone and in combination with butyrate, using flow cytometry (Figures 4B and S5). Both miR-593 and miR-1227 alone significantly increased the percentage of cells in the G0/G1 phase. In the presence of butyrate, miR-1227 significantly reduced the percentage of cells in the G0/G1 phase, while, conversely, miR-593 increased cells in this phase. miR-181a alone slightly, but significantly, increased the percentage of cells in the S phase; however, the combination of butyrate and miR-181a resulted in ~85% reduction in this phase compared with the butyrate-treated control. Furthermore, miR-593 and butyrate combination treatment significantly reduced the percentage of cells in the S phase by over 90%, while miR-1227 doubled the percentage of cells in S phase in the presence of butyrate. Notably, the combination of butyrate and miR-181a or miR-593 significantly increased the percentage of cells in G2/M. These data suggest that cell-cycle regulation does play a role in miRNA-mediated butyrate sensitization of CRC cells, partly through blocking of cells in S and G2/M phases, and may contribute to the observed proliferative changes.

#### WNT and PI3K signaling are key growth pathways involving predicted miRNA target genes

To identify cell growth or death signaling pathways involved in the miRNA-mediated butyrate sensitization of CRC cells, likely mRNA targets of miR-125b, miR-181a, miR-593, and miR-1227 were identified using the miRWalk target prediction platform to collate data from several programs (Figure 5A). To refine target gene lists, only those with hits in four or more programs were selected. Kyoto Encyclopedia of Genes and Genomes (KEGG) functional pathway analysis revealed enrichment in the “pathways in cancer” and “microRNAs in cancer” terms within the set of predicted targets for the butyrate-sensitizing miRNAs (Figure 5B). More specifically, the target gene sets were highly enriched for components of the WNT and PI3K signaling pathways within the term “pathways in cancer.” As many targets were predicted, literature review was used to further refine the list by identifying genes previously reported to be involved in promoting cell proliferation and inhibiting apoptosis in CRC and other

cancers. This resulted in a list of 11 predicted target genes that were considered relevant to the chemoprotective effects of miR-125b, miR-181a, miR-593, and miR-1227. To validate these genes as miRNA targets, their expression was measured by RT-PCR in HCT116 cells after transfection with the cognate miRNA mimic, with or without butyrate treatment (Figure 5C).

Two predicted targets of miR-125b, *TRIM29* and *ZEB1*, were examined. miR-125b mimics significantly reduced levels of *TRIM29* by ~2-fold in the absence of butyrate. In contrast, butyrate alone significantly increased *TRIM29* transcripts, and miR-125b mimics were not repressive under butyrate conditions. *ZEB1* was not inhibited by the miR-125b mimics, but it was induced by butyrate. Four predicted targets of miR-181a were examined: *COX2*, *FZD4*, *LRP6*, and *PIK3R3*. miR-181a mimics significantly decreased mRNA levels of *COX2* (~2-fold), *FZD4* (~1.3-fold), and *PIK3R3* (~1.3-fold), whereas they slightly but significantly increased *LRP6* transcript levels (~1.2-fold). Butyrate alone induced the expression of all four genes, and miR-181b mimics were not repressive under butyrate conditions, except marginally for *FZD4*. Interestingly, the combination of miR-181a mimics and butyrate increased transcript levels of three of the four genes (*COX2*, *LRP6*, and *PIK3R3*) more than butyrate alone.

Five predicted targets of miR-593 were examined: *CCND1*, *EEF2K*, *ERBB2*, *MET*, and *PAK2*. miR-593 mimics significantly decreased the transcript levels of *CCND1* (~3-fold), *EEF2K* (~1.7-fold), and *MET* (~1.5-fold). Butyrate alone was strongly repressive of all five of these target genes. The combination of miR-593 mimics with butyrate did not greatly alter the butyrate response, although, for *EEF2K*, the combination was slightly more repressive than butyrate alone. Three predicted targets of miR-1227 were examined: *DVL3*, *NUP62*, and *PIK3R3*. miR-1227 mimics significantly decreased expression of *DVL3* (~1.2-fold) and *NUP62* (~1.8-fold), but not *PIK3R3*. Butyrate alone moderately repressed *DVL3* and more strongly repressed *NUP62*; however, it induced *PIK3R3* expression. The combination of miR-1227 mimics and butyrate did not alter butyrate response of *DVL3* and *NUP62*, but the mimics did significantly inhibit the butyrate-mediated induction of *PIK3R3* transcript levels. Overall, these data identified several genes that may be targets of the miRNAs under study, including *TRIM29* (miR-125b); *COX2* and *PIK3R3* (miR-181a); *CCND1*, *MET*, and *EEF2K* (miR-593); and *DVL3* and *NUP62* (miR-1227).

#### Protein expression of predicted target genes is reduced by miRNA and butyrate in combination

To further validate the potential miRNA targets identified through mRNA expression analysis (Figure 5C), their protein levels were examined by immunoblotting after transfection of HCT116 cells

#### Figure 2. miRNAs enhance the anti-proliferative effects of butyrate in CRC cells

Left: (A–M) real-time cell index measurements using the xCELLigence RTCA platform, in HCT116 cells transfected with butyrate-sensitizing miRNAs treated with 0 mM or 2.5 mM butyrate at 48 h. Cells were analyzed at 72 h post transfection. Right: (A–M) Statistical results from unpaired t tests comparing NC (0 mM) versus miRNA mimic (0 mM) and NC (2.5 mM) versus miRNA mimic (2.5 mM) at 72 h post transfection. The mean  $\pm$  SEM of  $n = 4$  is shown. Significant results are indicated by \* $p < 0.05$ , \*\* $p < 0.01$ , \*\*\* $p < 0.001$ , \*\*\*\* $p < 0.0001$ . NC, NC mimic.

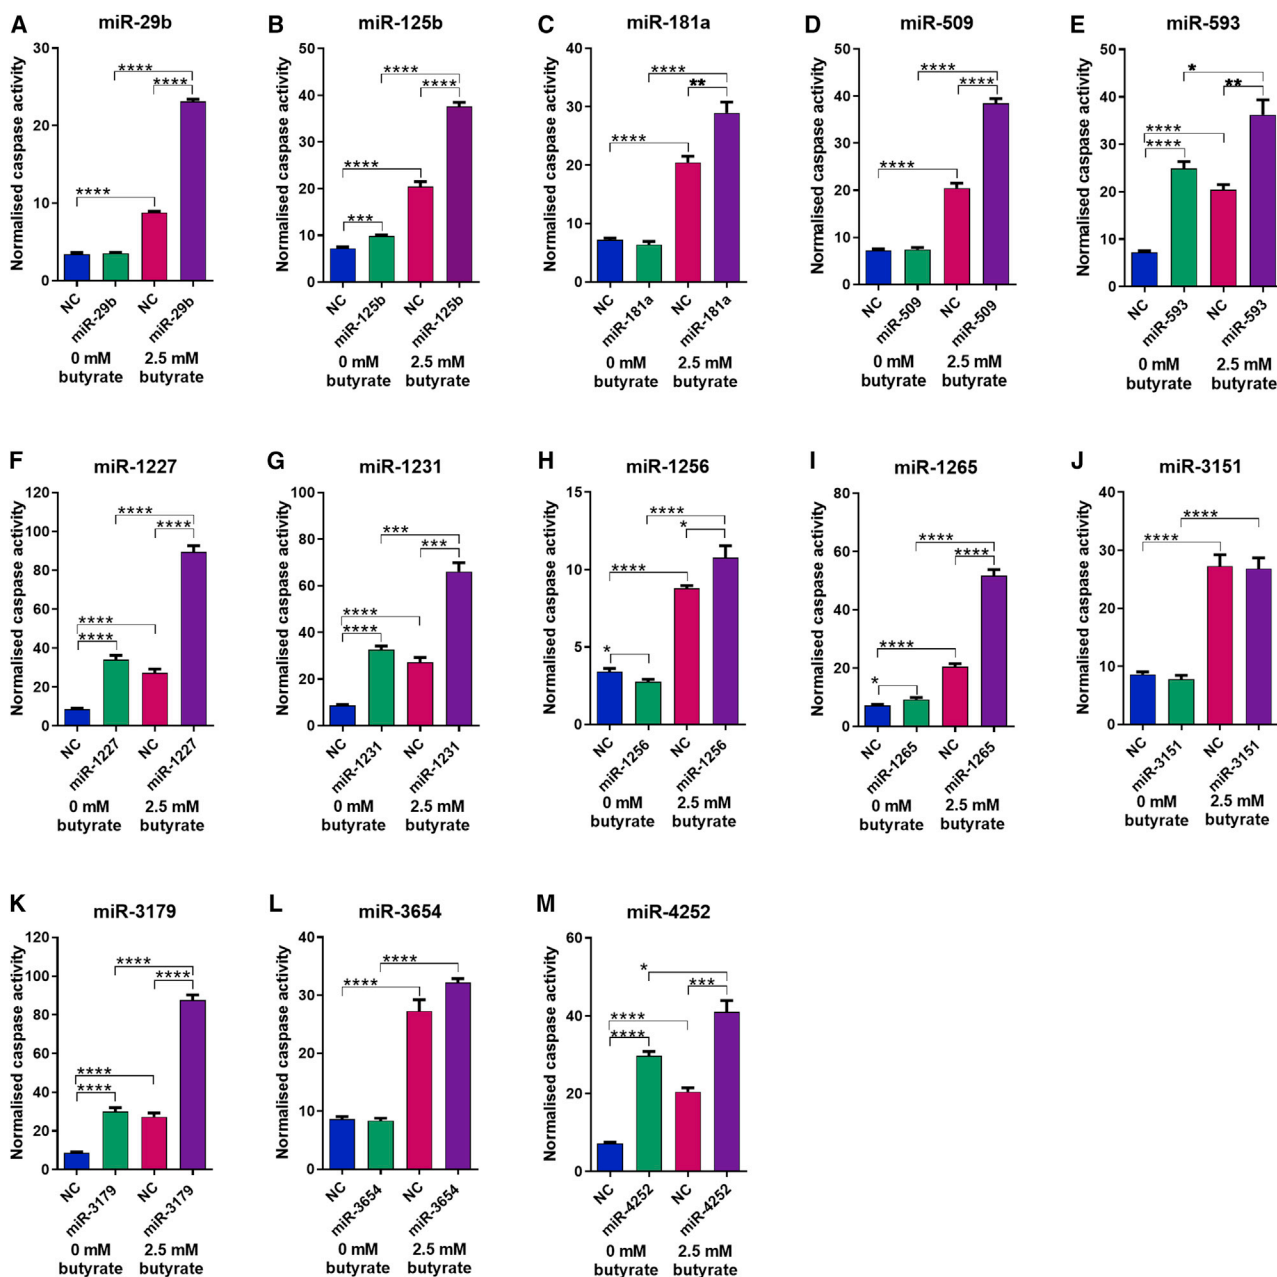

**Figure 3. miRNAs enhance the pro-apoptotic effects of butyrate in CRC cells**

Normalized caspase activity, using the Incucyte FLR platform, representing apoptosis in HCT116 cells transfected with butyrate-sensitizing miRNAs treated with 0 mM or 2.5 mM butyrate and CellPlayer 96-well caspase 3/7 reagent at 48 h post transfection (A–M). Statistical analysis including unpaired t tests comparing NC versus miRNA mimic (untreated) and NC versus miRNA mimic (both 2.5 mM). The mean  $\pm$  SEM of  $n = 4$  is shown. Significant results are indicated by \* $p < 0.05$ , \*\* $p < 0.01$ , \*\*\* $p < 0.001$ , \*\*\*\* $p < 0.0001$ . NC, NC mimic.

with miRNA mimics, alone and in combination with butyrate (Figure 6). Data showing normalization of protein levels are provided in Figure S5. *TRIM29* is a proposed target of miR-125b. Neither miR-125b mimics nor butyrate alone altered *TRIM29* protein levels; however, the combination of miR-125b and butyrate significantly reduced *TRIM29* protein. This result differs from the effects of these

epigenetic regulators on *TRIM29* mRNA levels, where butyrate alone and in combination with the mimic increased expression. *COX2* and *PIK3R3* are proposed targets of miR-181a. Transfection of miR-181a mimics alone significantly reduced protein levels of *PIK3R3*, but not *COX2*. Notably, *COX2* had relatively low protein levels in HCT116 cells. Butyrate alone did not alter *PIK3R3* protein levels, and the

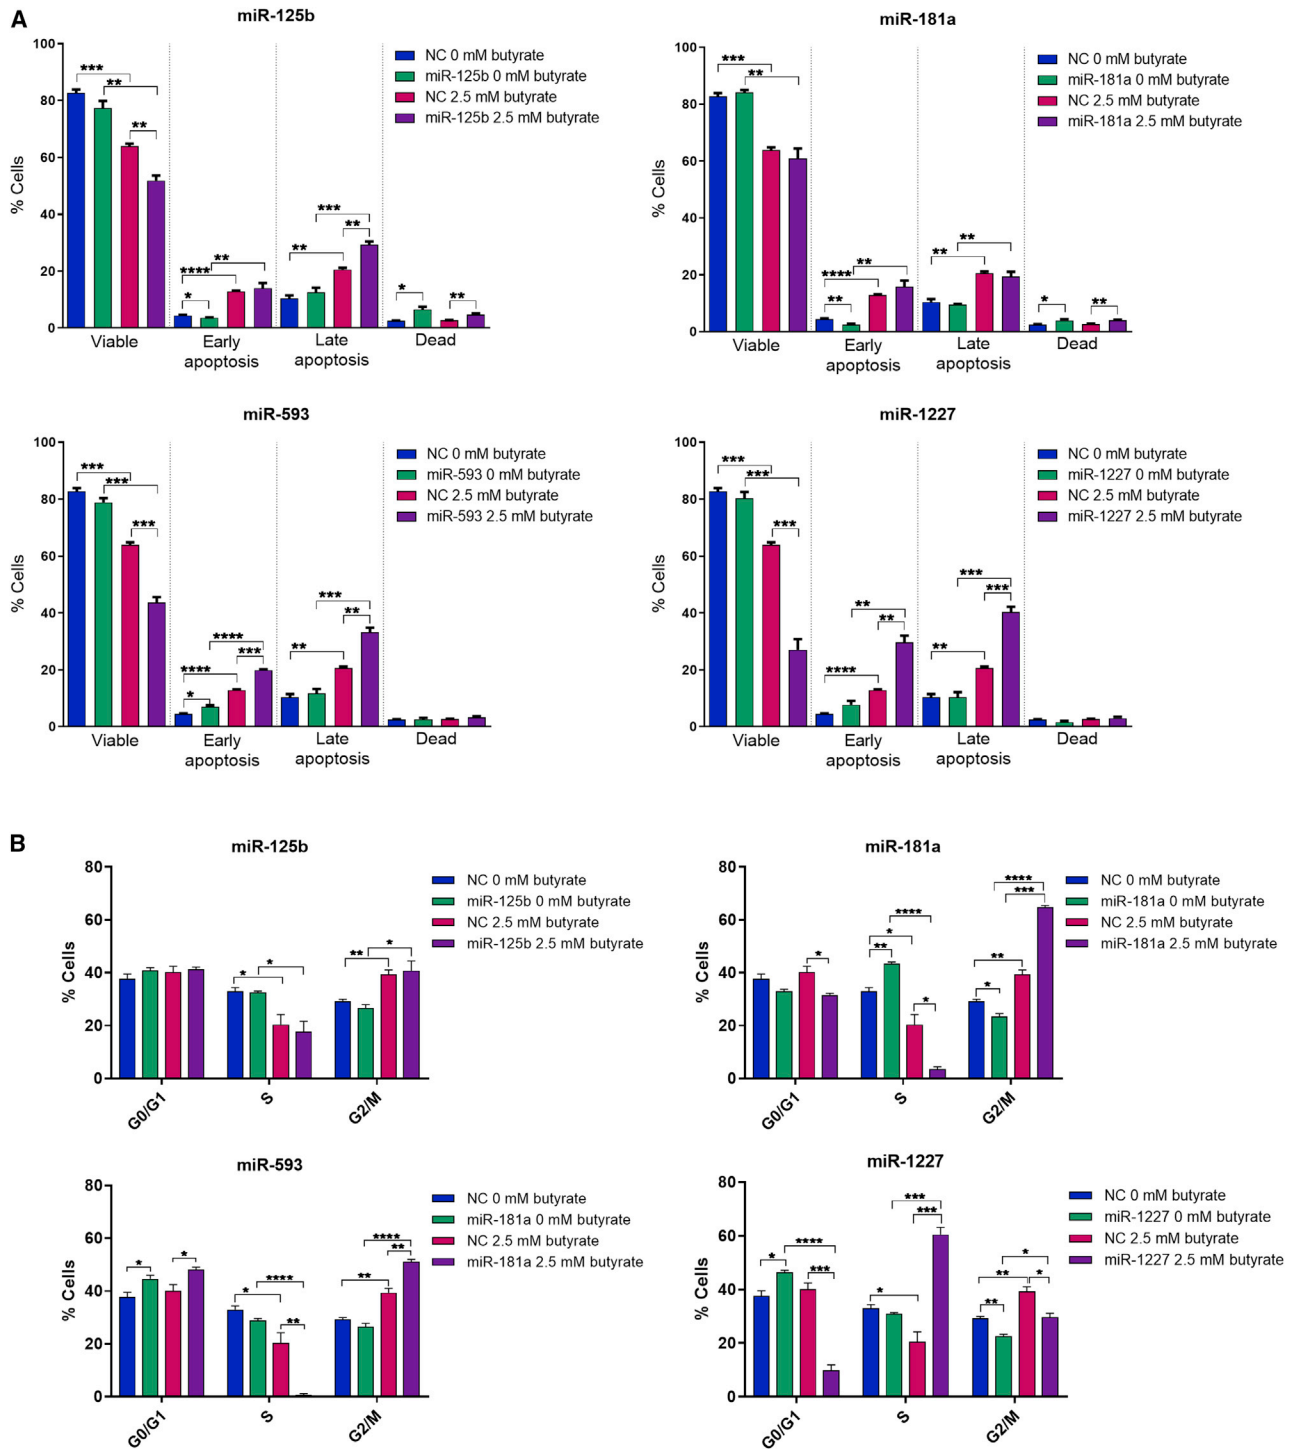

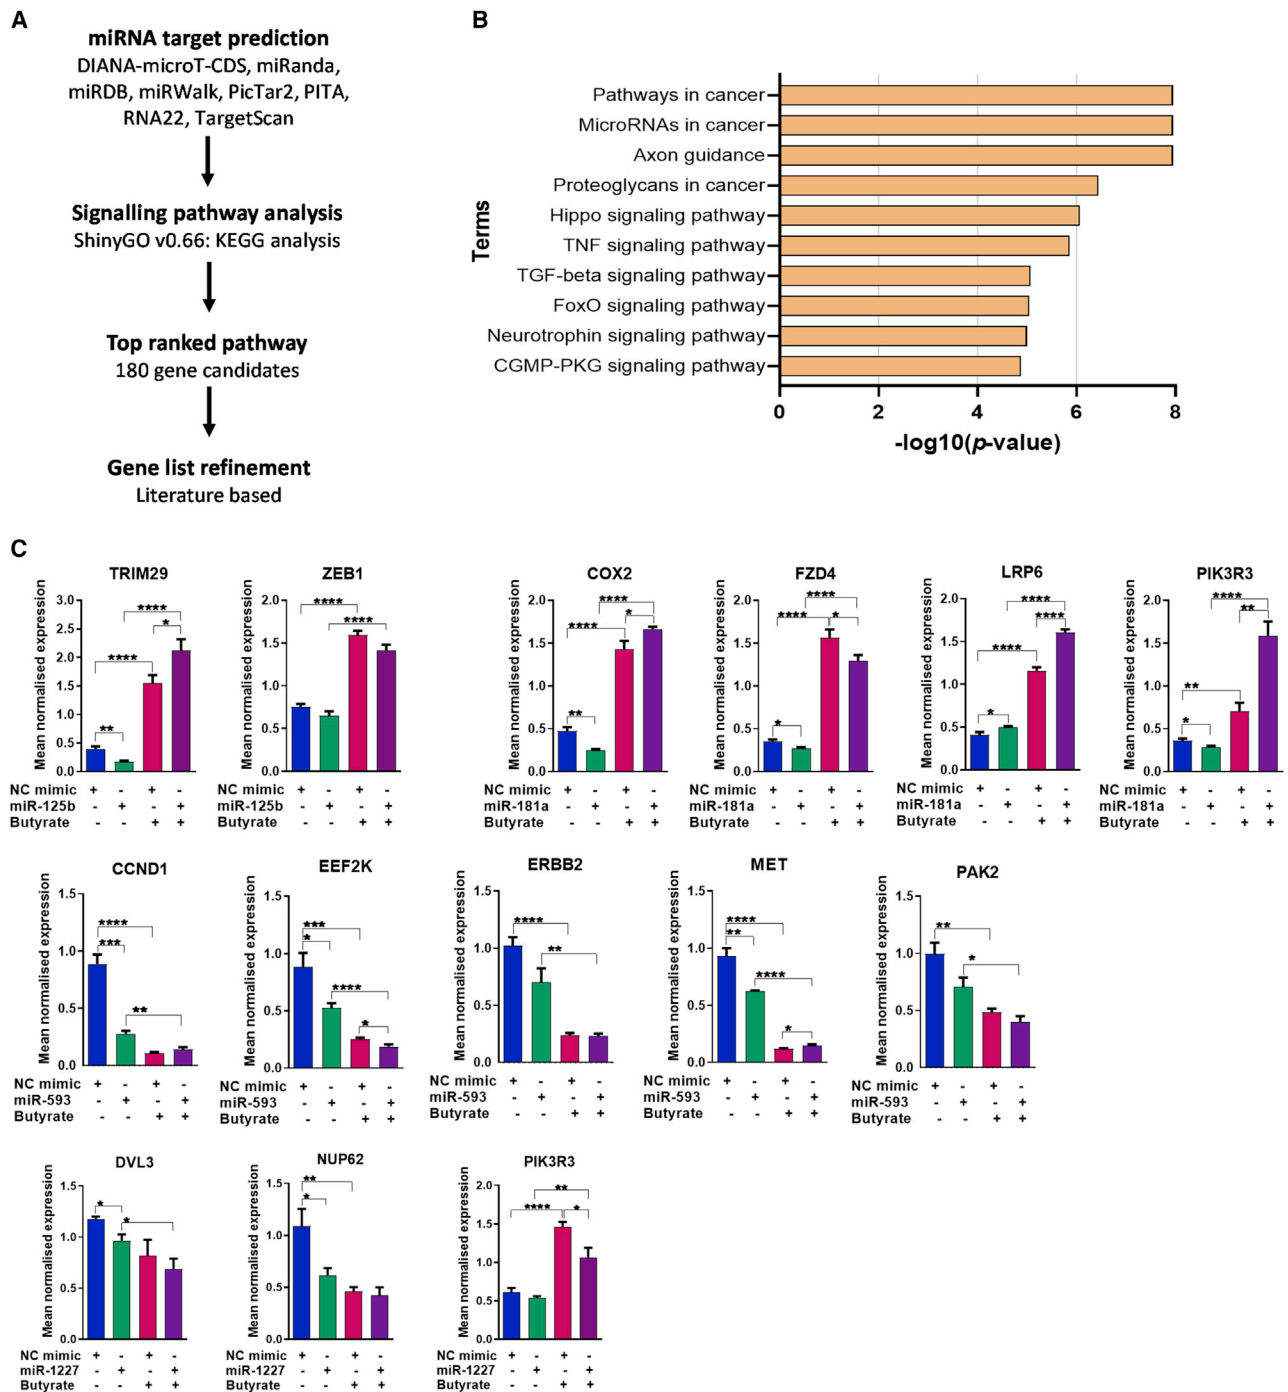

**Figure 5. miRNA target gene identification**

(A–C) (A) Flow chart describing miRNA target gene selection. (B) Functional enrichment analysis. Bar plot depicts the top 10 enriched biological pathways using KEGG, as identified after performing ShinyGO enrichment analysis with miR-125b, miR-181a, miR-593, and miR-1227 predicted target genes. The y axis represents the pathway term, and the x axis represents the enrichment significance ( $-\log_{10}$  p value), respectively. (C) Real-time RT-PCR analysis of miRNA predicted target gene mRNA levels in HCT116 cells after 24 h of butyrate treatment. miR-125b, *TRIM29* and *ZEB1*; miR-181a, *COX2*, *FZD4*, *LRP6*, and *PIK3R3*; miR-593, *CCND1*, *EEF2K*, *ERBB2*, *MET*, and *PAK2*; miR-1227, *DVL3*, *NUP62* and *PIK3R3* in HCT116 cells treated with 0 mM or 2.5 mM butyrate for 24 h, over a 72-h post-transfection period. The mean mRNA levels  $\pm$  SEM of five replicates is represented and their expression is normalized to the geometric mean of three reference genes, *ACTB*, *B2M*, and *GAPDH*. Significant values are indicated by \* $p < .05$ , \*\* $p < .01$ , \*\*\* $p < .001$ , \*\*\*\* $p < .0001$ . NC, NC mimic.



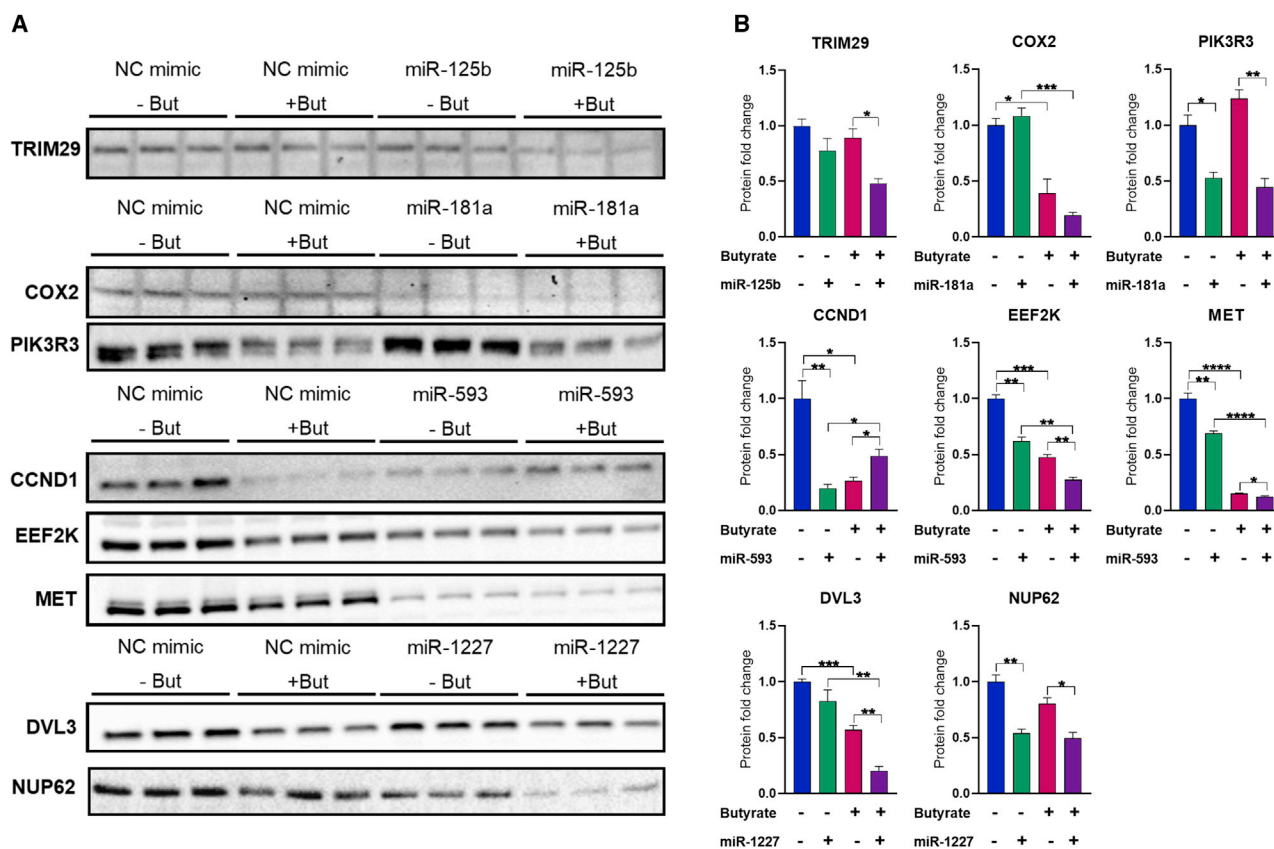

**Figure 6. Protein expression changes of miRNA predicted targets**

(A and B) (A) Western blots of HCT116 cells transfected with miR-125b, miR-181a, miR-593, miR-1227 or NC mimics for 48 h, followed by 24 h of treatment with 0 mM or 2.5 mM butyrate. Cells were analyzed at 72 h post transfection. (B) The protein fold change (intensity) of bands  $\pm$  SEM of the triplicates is represented for relative protein quantification, and the levels normalized to total protein loaded (Figure S5). All significant results are indicated by \* $p < 0.05$ , \*\* $p < 0.01$ , \*\*\* $p < 0.001$ , \*\*\*\* $p < 0.0001$ . NC, NC mimic.

combination of butyrate and miR-181a resulted in no further reduction in PIK3R3 protein levels compared with miRNA alone. Butyrate alone decreased COX2 protein levels, and the combination of butyrate and miR-181a did not significantly alter the PIK3R3 protein levels relative to butyrate alone. *CCND1*, *EEF2K*, and *MET* are proposed targets of miR-593. All three proteins showed reduced levels after transfection of miR-593 mimics alone. Levels of all three proteins were also reduced by butyrate alone. Moreover, for both *EEF2K* and *MET*, the combination of miR-593 and butyrate significantly decreased protein levels to a greater extent than either miR-593 or butyrate alone. These data are broadly consistent with mRNA level data and confirm all three genes are miR-593 targets that are also repressed by butyrate. *DVL3* and *NUP62* are proposed targets of miR-1227. Transfection of miR-1227 mimics alone significantly reduced *NUP62* protein levels, while *DVL3* appeared slightly reduced but the response was not significant. Butyrate alone significantly reduced protein levels of *DVL3*; moreover, the combination of miR-1227 and butyrate significantly decreased protein levels to a greater extent than either miR-1227 or butyrate alone. In contrast, there was no cooperative effect of miR-1227 and butyrate in regula-

tion of *NUP62* protein levels. Again, these data are broadly consistent with the mRNA level data shown in Figure 5 and support *DVL3* and *NUP62* being miR-1227 targets.

#### RNA interference of *DVL3* and *PIK3R3* mimics upstream miRNA activities

*DVL3* and *PIK3R3* are known to be involved in important pro-proliferative pathways. To determine whether these genes may be involved in the inhibitory effects of miRNAs and butyrate on CRC cell proliferation, HCT116 cells were transfected with *DVL3*, *PIK3R3*, or control (NC) small interfering RNAs (siRNAs), and treated with or without butyrate. The knockdown efficiency for *DVL3* was determined to be  $\sim 80\%$  and *PIK3R3*  $\sim 73\%$  (Figure 7A). *DVL3* knockdown alone did not have a significant effect on proliferation. Butyrate alone reduced cell proliferation by  $\sim 2$ -fold as expected. The combination of butyrate and *DVL3* knockdown was slightly but significantly more inhibitory than butyrate alone, with the CDI calculation indicating a weakly synergistic effect at 0.91 (Figures 7B and 7C, top panels). *PIK3R3* knockdown alone significantly reduced cell proliferation by almost 2-fold. Moreover,

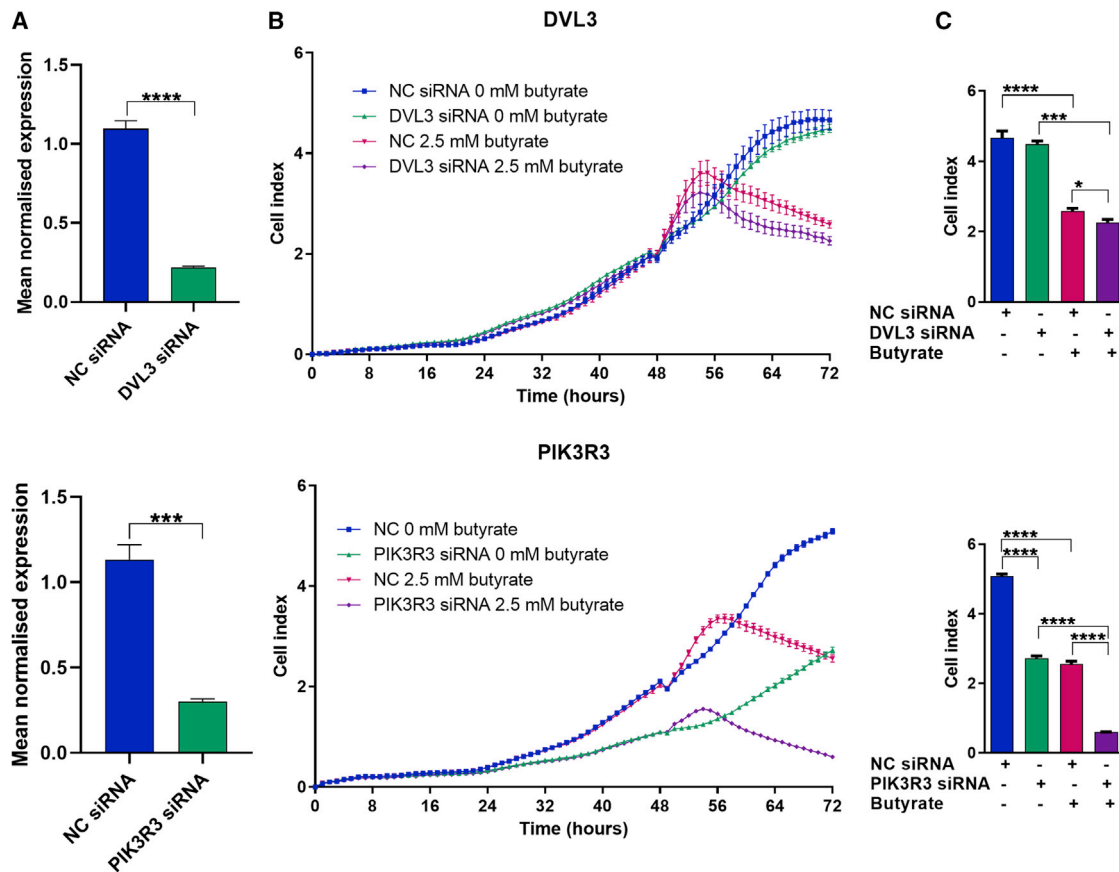

**Figure 7. siRNA targeting of DVL3 and PIK3R3 predicted target genes**

(A–C) mRNA levels of DVL3 or PIK3R3 in CRC cells (A) HCT116 cells transfected with NC, DVL3, and PIK3R3 siRNAs for 72 h. The mean mRNA levels  $\pm$  SEM ( $n = 3$ ) are represented, and their expression is normalized to the geometric mean of three reference genes, *ACTB*, *B2M*, and *GAPDH*. Real-time cell index measurements using the xCELLigence RTCA platform, in (B) HCT116 cells transfected with NC, DVL3, and PIK3R3 siRNAs for 48 h, followed by 24 h of treatment with 0 mM or 2.5 mM butyrate. Cells were analyzed at 72 h post transfection. (C) The mean  $\pm$  SEM ( $n = 4$ ) is shown at 72 h post transfection with DVL3 or PIK3R3 siRNA. Significant results are indicated by \* $p < 0.05$ , \*\*\* $p < 0.001$ , \*\*\*\* $p < 0.0001$ . NC, NC mimic.

*PIK3R3* knockdown greatly enhanced the inhibitory effect of butyrate, leading to  $\sim 6$ -fold reduction in proliferation relative to control conditions, with CDI calculation indicating a robustly synergistic effect at 0.44 (Figures 7B and 7C, bottom panels). Overall, these effects were broadly similar to the effects of overexpressing the proposed upstream miRNA regulators of these genes (miR-1227 and miR-181a).

### WNT signaling is hyperactivated by miRNAs

Several miRNAs that were found to alter CRC proliferation and survival in this study had predicted mRNA targets known to be involved in the WNT signaling pathway (e.g., *DVL3*, *FZD4*, *LRP6*, *CCND1*). Many of these WNT-associated targets were also butyrate responsive. The WNT pathway is known to play a critical role in initiation and progression of CRC.<sup>23</sup> HCT116 cells have high WNT activity as they express a constitutively active mutant *CTNNB1* ( $\beta$ -catenin) allele. They also carry the WT *APC* allele.<sup>24</sup> RKO cells are classified as low WNT activity cells, as they have WT *CTNNB1* and *APC* alleles as well as a mutant form of *CDX2*, which is involved in APC and

AXIN2 activation.<sup>25</sup> Four butyrate-sensitizing miRNAs, miR-125b, miR-181a, miR-593, and miR-1227, were examined for their capacity to alter WNT/ $\beta$ -catenin signaling using a TCF/LEF reporter TOPFlash assay in HCT116 and RKO cells. All assays were performed in the presence and absence of miRNA mimics, butyrate, and WNT3A. In HCT116 cells, WNT3A alone increased TOPFlash reporter activity by  $\sim 4$ -fold, while butyrate alone greatly increased TOPFlash activity by  $\sim 200$ -fold (Figure 8A). Of the four miRNAs transfected, only miR-181a alone (i.e., in the absence of WNT3A or butyrate) significantly increased TOPFlash activity by  $\sim 2$ -fold. When mimics were transfected in the presence of WNT3A, both miR-125b and miR-181a significantly increased activation of TOPFlash relative to that induced by ligand alone, while miR-1227 slightly reduced activation. In general, the miRNAs did not alter the ability of butyrate to activate TOPFlash, although miR-593 very slightly reduced the response. When WNT3A and butyrate were both applied to cells, miR-181a was the only mimic that could significantly increase TOPFlash activity above the level produced by the

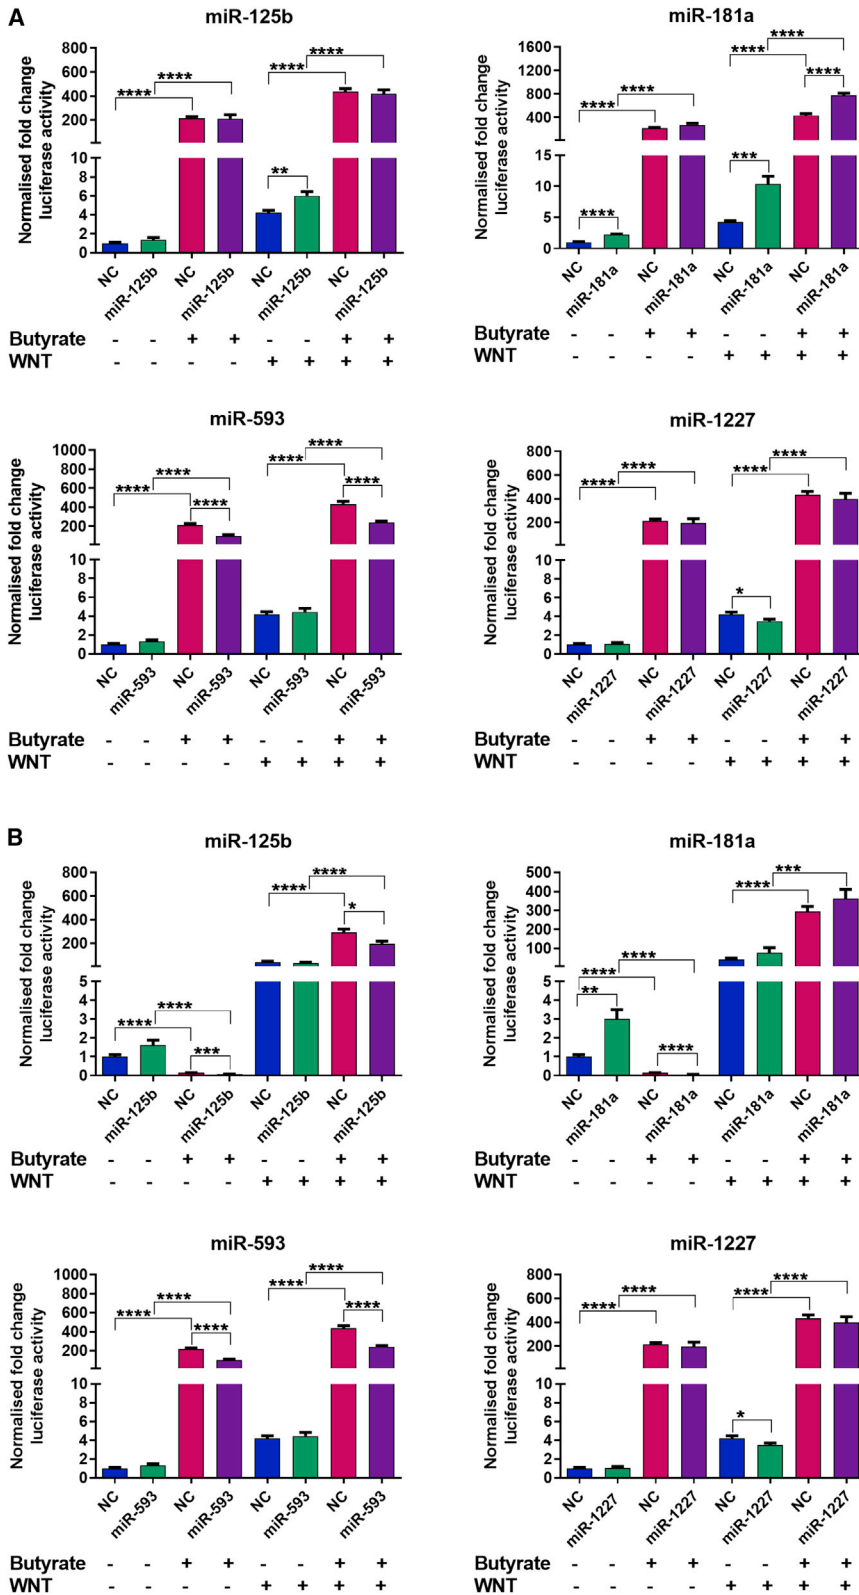

**Figure 8. Butyrate-responsive miRNAs and butyrate alter WNT-reporter activity in HCT116 and RKO cells**

(A and B) WNT-reporter activity in (A) HCT116 or (B) RKO cells reverse transfected with TOPFlash vectors and butyrate-sensitizing miRNAs miR-125b, miR-181a, miR-593, or miR-1227, for 48 h, followed by 24 h of treatment with 0 mM or 2.5 mM butyrate. Cells were analyzed at 72 h post transfection. The mean  $\pm$  SEM of four replicates is shown. Significant results are indicated by \* $p < 0.05$ , \*\* $p < 0.01$ , \*\*\* $p < 0.001$ , \*\*\*\* $p < 0.0001$ . NC, NC mimic.

combination of both drugs. Overall, these data suggest that miR-181a and miR-125b can potentiate WNT responses in HCT116 cells. Relative to HCT116 cells, RKO cells showed much greater activation of TOPFlash by WNT3A alone (~50-fold), and the reporter was robustly repressed by butyrate alone (~10-fold). Interestingly, butyrate was not repressive in the presence of WNT3A, and instead potentiated activation of TOPFlash by the ligand. Of the four miRNAs tested, only miR-1227 and miR-181a alone (i.e., in the absence of WNT3A or butyrate) significantly induced TOPFlash activity (Figure 8B). The miRNAs were not able to potentiate the response of TOPFlash to WNT3A, nor did they increase the response to the combination of WNT3A and butyrate; in fact, miR-125b and miR-1227 slightly reduced activation in the latter condition. All miRNAs also induced a small reduction in TOPFlash activity in cells treated with butyrate but no ligand. Overall, these data further support the idea that miR-181a can potentiate WNT responses in CRC and suggest miRNA activities may depend on cell-type specific variables that define the threshold for WNT target activation.

## DISCUSSION

Butyrate is a naturally occurring HDACi with the ability to inhibit proliferation, promote apoptosis, and regulate the cell cycle in CRC cells by altering the expression of genes, including those for non-coding RNAs such as miRNAs. The anti-cancer effects of butyrate may be mediated in part through suppression of specific oncogenic miRNAs. In addition, miRNAs could function cooperatively with other tumor-suppressing epigenomic changes induced by butyrate. The overarching goal of this project was to identify cooperative activity between miRNAs and butyrate that may ultimately inform the development of novel therapeutic approaches to CRC that combine small RNAs with butyrate or other HDAC inhibitors. An unbiased high-throughput functional screen identified 13 miRNAs that synergized with butyrate to reduce cell proliferation and promote apoptosis in CRC cells. From this list of putatively butyrate-sensitizing miRNAs, miR-125b, miR-181a, miR-593, and miR-1227 were empirically selected for further analysis. While the three miRNAs with lowest CDI values were studied in detail, others that showed a synergistic response with butyrate, such as miR-29b-2-5p, miR-509-5p, miR-1256, miR-1265, miR-3179, and miR-3654, may also identify useful drug targets and could be examined in future studies.

miR-125b, miR-593, and miR-1227 were all confirmed to enhance the pro-apoptotic activity of butyrate. The pro-apoptotic effects of miR-1227 in both HCT116 and LIM1215 cancer cells are a novel finding in this study. While both cell lines display dysregulated WNT signaling, their genotypes otherwise differ, suggesting a consistent CRC response to the miRNAs. Previous studies have shown that miR-593 can induce apoptosis and inhibit cell proliferation in lung cancer and hepatocellular carcinoma cells.<sup>26,27</sup> Conversely, miR-593 was shown to have oncogenic properties in prostate cancer cells,<sup>28</sup> suggesting cell-type-specific responses. In contrast to a previous report,<sup>29</sup> miR-181a was not found to induce apoptosis of HCT116 cells in the absence of butyrate. This discrepancy may relate to differences in methodology, or heterogeneity between cell lines maintained in

different laboratories.<sup>30</sup> However our finding that miR-181a reduces HCT116 cell proliferation was consistent with a previous report.<sup>31</sup> All four miRNAs examined increased caspase activity in noncancerous HFF, highlighting the need to mitigate any potential toxicity to normal cells when considering RNA-based cancer therapeutics.<sup>32,33</sup>

Dysregulation of the cell cycle is critical in promoting uncontrolled cell division and contributing to the development of cancer. The anti-cancer properties of butyrate are partly attributed to cell-cycle regulation through induction of cell-cycle inhibitors such as *CDKN1A* and *GADD45A*, and inhibition of cell-cycle progression genes *CCND1*, *CCNA2*, and *CDK6*.<sup>10,34,35</sup> This study demonstrated that butyrate inhibits cell proliferation by causing accumulation of CRC cells in the G2/M phase. Previous studies support this observation, with 5 mM butyrate demonstrated to induce G2/M phase cell-cycle arrest in HCT116, RKO, and SW480 CRC cells.<sup>36,37</sup> Interestingly, studies have shown that butyrate can also induce G0/G1 cell-cycle arrest in other CRC cell lines, including Caco-2 and HT29.<sup>35,38</sup> These different responses may relate to differences in the mutational status of these CRC models. We found that miR-181a and miR-593 enhanced the ability of butyrate to induce G2/M phase blockade and reduce the number of cells in S phase. While these miRNAs are poorly characterized in CRC cells, there is evidence that miR-181a is involved in cell-cycle regulation in other contexts. For example, miR-181a induced G1 arrest in prostate cancer cells,<sup>39</sup> but conversely promoted cell-cycle progression and proliferation in gastric cancer.<sup>40</sup> Overall, these data suggest that the effects of miR-181a on the cell cycle are context specific. Although miR-1227 enhanced the ability of butyrate to reduce cell proliferation, miR-1227 mimics did not enhance the ability of butyrate to induce G2/M arrest, and instead increased the fraction of cells in S phase. Mechanisms that induce S-phase arrest in HCT116 cells (e.g., in response to cytotoxic drugs) include inhibition of DNA synthesis proteins such as topoisomerase<sup>41,42</sup>; whether such mechanisms are involved in miR-1227-mediated S-phase accumulation requires further investigation. Although miR-125b was previously shown to induce G2/M phase arrest in HCT-8 CRC cells,<sup>43</sup> this miRNA had no effect on the cell cycle in the current study, suggesting that it may regulate proliferation through alternative mechanisms in HCT116 cells.

The ability of specific miRNAs to modulate cell proliferation, cell cycle, and apoptosis is generally due to modulation of specific downstream target mRNAs. Pathway enrichment analysis of predicted miRNA target genes revealed significant overrepresentation of genes in cancer-related growth pathways, including WNT and PI3K signaling under the Gene Ontology (GO) term “pathways in cancer.” WNT-related target genes were common among all miRNAs and included *TRIM29* (miR-125b); *COX2*, *FZD4*, *LRP6* (miR-181a); *CCND1* (miR-593); and *NUP62* and *DVL3* (miR-1227). All miRNA mimics were able to reduce the transcript levels of their predicted target genes, although further work is required to determine whether this involves direct miRNA:mRNA binding. These target genes showed diverse responses to butyrate treatment. Notably, all the miR-125b and miR-181a target genes examined were induced by

butyrate, while most of the miR-593 and miR-1227 target genes were repressed by butyrate. The induction of mRNA targets of miR-125b and miR-181a may be due to the global effect of HDACi on increasing chromatin accessibility and hence transcriptional activation. In contrast, the repression of miR-593 and miR-1227 target genes may be mediated by induction of repressors that control these genes at transcriptional or post-transcriptional levels, including the miRNAs themselves.

Four of six miRNA targets that were reduced at the mRNA level by their cognate miRNA mimics also showed reduction at the protein level. A lack of correlation in miRNA-mediated changes in mRNA and protein expression levels is not uncommon<sup>44-46</sup> and likely reflects the multiple modes of regulation involved, including transcription, translation, and RNA and protein turnover.<sup>47,48</sup> In addition, miRNAs can regulate protein synthesis by destabilizing their target mRNAs in order to decrease mRNA abundance or by inducing translational inhibition that does not affect mRNA levels.<sup>49</sup>

To assess whether specific downstream target genes were responsible for the butyrate-sensitizing effects of miRNAs, selected targets (*PIK3R3*, *DVL3*) were knocked down by RNA interference, and proliferation was examined. *PIK3R3* knockdown had the most potent effect on HCT116 growth alone and in combination with butyrate, echoing the effects of miR-181a mimics. In contrast, *DVL3* knockdown had only a modest effect on proliferation, in contrast to the potent anti-proliferative effect of miR-1227. The effects of miR-1227 may be primarily mediated through other targets that are yet to be identified. *PIK3R3* encodes the regulatory subunit of the PI3K signaling complex. *PIK3R3* is mutated, or overexpressed, in many solid tumors and it has been associated with epithelial to mesenchymal transition in CRC.<sup>50</sup> A previous study demonstrated that the combination of PI3K catalytic subunit inhibitors (Wortmannin or LY294002) and 5 mM butyrate was pro-apoptotic and anti-proliferative in KM20 cells.<sup>51</sup> This highlights the importance of phosphoinositide 3-kinase (PI3K) signaling in the butyrate response, as a potent anti-cancer effect can be induced by inhibiting either the catalytic subunit<sup>51</sup> or the *PIK3R3* regulatory subunit, as shown in the current study. Future work could be directed at examining the therapeutic benefits of combined HDACi and PI3K pathway inhibition in CRC.

Many miRNA targets that were investigated in this study, including *TRIM29*, *COX2*, *PIK3R3*, *CCND1*, *EEF2K*, and *DVL3*, have been shown to be overexpressed in CRC and involved in promoting cell proliferation, migration, invasion, and metastasis.<sup>52-60</sup> In addition, some of these targets, including *COX2* and *CCND1*, are known to be reduced after butyrate treatment of CRC cells.<sup>10</sup> Of particular interest was the enrichment of genes involved in WNT signaling within the predicted targetome of the butyrate-sensitizing miRNAs. WNT is a critically dysregulated growth pathway in CRC.<sup>61</sup> Moreover, butyrate is a well-known modulator of WNT signaling with the ability to regulate >1,000 genes in a WNT-specific manner in CRC cells.<sup>62</sup> HCT116 cells express a constitutively active  $\beta$ -catenin allele and

display high basal WNT signaling. Butyrate-induced WNT hyperactivity may also create the synthetic lethal context for inducing apoptosis that was exploited in this functional screen. All the butyrate-sensitizing miRNAs examined in this study had at least one predicted target gene that can be functionally linked to WNT signaling. *DVL3* is a hub phosphoprotein that negatively regulates the destruction complex and stabilizes  $\beta$ -catenin to promote gene expression.<sup>63</sup> *TRIM29* is involved in promoting WNT signaling through the regulation of  $\beta$ -catenin stabilization, localization, and expression.<sup>52</sup> Knockdown of *TRIM29* in CRC resulted in reduction of  $\beta$ -catenin expression and nuclear accumulation.<sup>52,64</sup> Evidence also supports the association of the nuclear pore protein, NUP62, with  $\beta$ -catenin nuclear import; however, the extent to which it regulates WNT signals remains undefined.<sup>65</sup> Some other genes, such as *COX2* (proinflammatory protein) and *CCND1* (cell-cycle regulator), are direct targets of the  $\beta$ -catenin/TCF/LEF transcriptional complex.<sup>66,67</sup>

To explore the role of the butyrate-sensitizing miRNAs in canonical WNT signaling, a WNT/ $\beta$ -catenin reporter assay was used in cell lines with differing basal WNT activity. RKO cells showed robust induction of WNT-reporter activity by WNT3A, while HCT116 cells showed minimal response. This can be attributed to the differential expression of ligand-dependent WT  $\beta$ -catenin versus constitutively active mutant  $\beta$ -catenin in these cell lines. Indeed, previous reports show that WNT3A induces a dose-dependent increase in WT  $\beta$ -catenin levels in RKO cells, but does not alter mutant  $\beta$ -catenin levels in HCT116 cells.<sup>68</sup> Butyrate alone dramatically induced WNT-reporter activity in HCT-116 cells. The WNT pathway is considered pro-proliferative in CRC; hence, it was somewhat surprising that anti-proliferative butyrate induced WNT activity. However, activity of the TOPFlash reporter, which has multimeric TCF-binding sites, may not be reflective of the native pro-proliferative WNT targetome. Indeed, known pro-proliferative WNT targets such as *CCND1* have a single TCF/ $\beta$ -catenin-binding site in their promoter, whereas targets such as *AXIN2* that provide negative feedback to the WNT pathway have multiple binding sites.<sup>69</sup> Such different promoter configurations can confer different regulatory mechanisms and outcomes. RKO cells showed reduced WNT-reporter activity after 24 h of butyrate exposure. This was in contrast to a previous study that found weak induction of WNT activity in RKO cells after 48-h exposure to 5 mM butyrate.<sup>70</sup> Given that WNT signaling is under tight temporal control via the AXIN-mediated feedback loop, the discrepancy between our findings and this previous report could relate to differences in timing. To better understand the role of WNT pathway modulation in the anti-cancer effects of butyrate, future work could examine the temporal effect of butyrate on the global WNT targetome in a variety of CRC cells with different WNT pathway mutations. As WNT signaling also regulates the stem cell characteristics of enterocytes, it may be inferred that the stemness of cultured CRC cells is modulated by the treatments described in this study. Also, this may induce heterogeneity within cultures that could explain phenomena such as the aforementioned discordance between mRNA and protein levels for miRNA targets. However, HCT116 cells are thought to consist mainly of stem-like cells with considerable plasticity rather



than being a hierarchical model with clear clonal progression,<sup>71</sup> making this explanation less likely.

Although none of the miRNAs investigated in this study synergized with WNT3A or butyrate in the regulation of WNT-reporter activity, miR-181a and miR-1227 both significantly increased activity in the absence of WNT ligand in RKO cells. The very high level of reporter activity in the presence of WNT3A may have provided little capacity for miRNAs to further induce activity in this model (i.e., a ceiling effect). Interestingly, miR-181a also increased  $\beta$ -catenin activity in both the presence and absence of WNT ligand in HCT116 cells. This result contrasts with a previous report that miR-181a can inhibit WNT signaling in HCT116 cells, and targets both  $\beta$ -catenin and TCF4.<sup>31,72</sup> However, miR-181a is also known to inhibit the WNT signaling inhibitor WIF1 in CRC cells,<sup>73</sup> suggesting that miR-181a has multifactorial roles in WNT signaling, and its effects may depend on the balance of other WNT pathway factors present in cells.

### Conclusion

Overall, this study identified several miRNAs and potential target genes that could enhance the ability of butyrate to reduce CRC cell proliferation and induce apoptosis. Butyrate-sensitizing miRNAs were found to promote the inhibition of cell-cycle progression, while predicted miRNA targets were involved in key cancer-related growth pathways, including WNT and PI3K signaling. Further analysis of the potent anti-cancer effects of PIK3R3 inhibition in combination with butyrate is warranted, particularly in 3D culture and *in vivo* models. Moreover, further study of both butyrate-sensitizing miRNAs and miRNAs that inhibit the butyrate response could help to unravel mechanisms by which butyrate exerts anti-cancer activity. Ultimately, such studies could provide a basis for developing miRNAs as potential therapeutics for CRC.

## MATERIALS AND METHODS

### Cell culture

Human HCT116 and LIM1215 colorectal carcinoma cells were acquired from American Type Culture Collection (ATCC). Cells were maintained at 37°C and 5% CO<sub>2</sub> in McCoy's 5A (modified) medium or Dulbecco's modified Eagle's medium (DMEM) (Invitrogen) containing 10% fetal bovine serum (Bovogen Biologicals) respectively. Cells were grown to <85% confluence and maintained mycoplasma free.

### Functional high-throughput screen

Reverse transfection of HCT116 cells was performed in poly-L-lysine-coated 384-well plates in duplicate with a miRNA mimic library (1,280 mature miRNAs, Human miRIDIAN miRNA Mimic Library V16, Dharmacon) or siRNA controls. siRNA controls on each plate included "positive death" control siRNAs siPLK1 and siTOX (Dharmacon RNAi Technologies), positive miRNA mimic control miR-18a, NC siRNA (GenePharma) ON-TARGETplus Non-targeting Control siRNA (OTP-NT) (Dharmacon), and mock transfection control (lipid only). In brief, HCT116 cells (1,400 cells/well in 25  $\mu$ L of McCoy's 5A [modified] medium) were seeded into each well contain-

ing 12.5  $\mu$ L of transfection mix (0.06  $\mu$ L of DharmaFECT 2 in 10.565  $\mu$ L of Opti-MEM and 1.875  $\mu$ L of miRNA mimic [stock concentration 0.5  $\mu$ M] to give a final concentration of 25 nM or 0.06  $\mu$ L of DharmaFECT 2 in 10.94  $\mu$ L of Opti-MEM and 1.5  $\mu$ L of siRNA [stock concentration 1  $\mu$ M] to give a final concentration of 40 nM). Plates were incubated at room temperature for 20 min and then incubated at 37°C for 24 h. Medium was changed on all assay plates 24 h post transfection with 50  $\mu$ L of pre-warmed medium added to each well. Plates were incubated for a further 24 h before being treated with no butyrate or a sublethal dose of 2.5 mM butyrate (non-treatment or treatment plates) as part of another full medium change. At the 72-h endpoint, cells were subjected to an ApoLive-Glo Multiplex assay (Promega). Liquid handling steps were performed using a BioTek EL406 (BioTek, Burlington, VT) and SciClone ALH3000 Automated Liquid Handler (PerkinElmer, Hopkinton, MA).

The ApoLive-Glo Multiplex assay (CellTiter-Fluor (CTF) followed by Caspase-Glo 3/7 in the same wells) was performed at 72 h post transfection as per manufacturer's instructions. Each well was incubated with 5  $\mu$ L of CTF at 37°C in a humidified incubator for 1 h 30 min. Fluorescent changes were quantified using a Synergy H4 plate reader (BioTek). Each well was then incubated with 12  $\mu$ L of Caspase-Glo 3/7 at room temperature for 30 min and luminescence was measured using the same plate reader.

### Hit selection

Quality control analysis was performed to determine the quality and reliability of the screen data, including the dynamic range between the positive controls and NCs using the Z' factor and Pearson correlation.<sup>74</sup> Raw values for individual replicates were normalized to the average of the raw values for the OTP-NT NC for the same plate. An average of normalized values for duplicates was calculated to obtain the final normalized value per treatment. Cell viability (CV) results were categorized as Hi: > 1.15 fold change relative to NC (increase), CV1: between 0.8 and 1.15 (no change), CV2: between 0.8 and 0.5 (decrease), lethal cell viability (LC): < 0.5 (lethal effect). Caspase data were analyzed using Z score distribution,<sup>75</sup> with a robust Z score >2 indicating significant caspase activity and an average fold change ratio, a positive ratio (>1) indicated increased apoptosis when the miRNA was effective with butyrate treatment compared with the NC. For viability, hits were classified into distinct subgroups: hit 1 was defined as vehicle CV1 and drug CV2, hit 2 was defined as vehicle CV1/CV2 and drug LC, hit 3 was defined as vehicle CV1/Hi and drug CV2/CV1, and hit 4 was defined as vehicle Hi and drug CV1. For caspase activity, Z score distribution and positive fold change values were used, with a robust Z score >2 and positive fold change ratio >1 indicating significant caspase activity. These values were ranked as Hi and then sorted on vehicle versus drug.

### Cell proliferation and apoptosis assays

Reverse transfections were performed using HCT116 or LIM1215 cells seeded in 16-well E-plates (xCELLigence proliferation assays; ACEA Biosciences), 96-well plates (apoptosis), or 24-well plates (RNA and protein extractions). miRNA mimics or NC scramble

mimics were reverse transfected into cells at a final concentration of 20 nM using Lipofectamine 2000 (Invitrogen) lipid reagent. After 48 h post transfection, cells were treated with 2.5 mM butyrate for a further 24 h and results collected at the 72-h endpoint.

Proliferation changes were detected using the xCELLigence RTCA DP platform (ACEA Biosciences) and measured as cell index (electrical impedance in the cell medium). Proliferation changes were measured every 30 min over a 72-h incubation period. The coefficient of drug interaction was calculated for proliferation data using the calculation  $CDI = AB/(A \times B)$ , whereby A is miRNA mimic/inhibitor/siRNA to NC ratio, B is 2.5 mM butyrate treatment to NC, and AB is a combination of miRNA mimic/inhibitor/siRNA and 2.5 mM butyrate treatment to NC ratio.<sup>76</sup>  $CDI < 1$ ,  $= 1$ , or  $> 1$  indicates that the drugs are synergistic, additive, or antagonistic, respectively, and a  $CDI < 0.7$  indicates that the drug is significantly synergistic.

Apoptosis was measured at 72 h post transfection using CellPlayer 96-well Caspase 3/7 reagent (Essen BioScience) as per the manufacturer's instructions. The Incucyte FLR (Essen BioScience) was used to image fluorescence changes in cells. Cell images were used to calculate the fluorescent cell count, using the IncuCyte Object Counting v2.0 Analysis software (Essen BioScience).

#### miRNA target prediction and pathway analysis

miRWalk<sup>77</sup> was used to collate information about predicted miRNA target genes using eight prediction programs: DIANA-microT-CDS,<sup>78</sup> miRanda,<sup>79,80</sup> miRDB,<sup>81</sup> miRWalk,<sup>77</sup> PicTar2,<sup>82</sup> PITA,<sup>83</sup> RNA22,<sup>84</sup> and TargetScan.<sup>85</sup> Predicted target genes were labeled as hits if four or more prediction programs identified those genes as possible miRNA targets (specifically if miRNAs had 3' UTR binding sites for those genes). Gene lists were compiled and transferred into ShinyGO<sup>86</sup> online graphical gene-set enrichment tool for KEGG pathway enrichment analysis.<sup>87</sup>

#### Real-time RT-PCR

Total RNA was extracted using TRIzol reagent (Thermo Fisher Scientific) according to the manufacturer's protocol. For mRNA expression analysis, RNA was DNase I treated, and cDNA synthesized using 25- $\mu$ L reactions of M-MLV Reverse Transcriptase (Promega), RNase H minus (Promega), random hexamer primers (NEB), and 1  $\mu$ g of total RNA. Real-time qPCR was performed using Power SYBR Green Mastermix (Applied Biosystems) in 20- $\mu$ L reactions including 18  $\mu$ L of Mastermix and 2  $\mu$ L of cDNA product (1:5 dilution). Primers were designed using Primer-Blast (NCBI) and purchased from GeneWorks or Sigma-Aldrich (sequences are listed in Table S3). Raw data were normalized against the geometric mean of the reference genes *GAPDH*, *B2M*, and *B-actin*.

#### Immunoblots

Whole cell protein was extracted using radioimmunoprecipitation assay (RIPA) buffer and quantified using EZQ protein quantification kit (Invitrogen). SDS-PAGE was performed using 25–35  $\mu$ g of protein extracts in pre-cast Mini-PROTEAN TGX Stain-Free Gels (Bio-Rad), and pro-

teins were transferred to polyvinylidene difluoride (PVDF) membranes using the Trans-Blot Turbo transfer system (Bio-Rad). Membranes were blocked with 5% BSA or skim milk powder for 1 h in TBS-T prior to overnight incubation with Cyclin D1 (92G2) Rabbit Monoclonal Antibody (mAb) #2978, COX2 Antibody #4842, Dvl3 Antibody #3218, eEF2k Antibody #3692, Met (D1C2) XP Rabbit mAb #8198, PI3 Kinase p55 (D2B3) Rabbit mAb #11889 (Cell Signaling Technology), NUP62 Antibody ab140651 (Abcam), TRIM29 Antibody GTX115749 (Genetex, CA, United States). Membranes were exposed to secondary horseradish peroxidase-conjugated donkey anti-rabbit immunoglobulin G (IgG) (Immunopure) in 5% skim milk powder for 1 h. Enhanced chemiluminescence (ECL) detection (SuperSignal West Pico) was used to visualize protein bands using the ChemiDoc MP Imaging system (Bio-Rad). Total protein normalization was used to analyze the data.

#### WNT signaling activity

TOPFlash and FOPflash (NC) WNT/ $\beta$ -catenin activity assay plasmids were purchased from Merk Millipore. HCT116 cells were seeded at 7,500 per well in 96-well clear Greiner plates and incubated at 37°C for 24 h. Cells were then transfected with 50 ng per well TOP/FOP flash vector (Firefly luciferase), 5 ng per pRL Null vector (Renilla luciferase), and 20 nM miRNA mimics, using Lipofectamine 2000 and Opti-MEM. Cells were incubated for a further 24 h at 37°C. Cells were exposed to medium from L cells with and without WNT3a and treated 2.5 mM butyrate in selected wells. Control wells did not have butyrate added to conditioned medium. Cells were incubated for a further 24 h at 37°C. At 72 h, Dual-Luciferase Reporter Assays were performed (Promega) as per manufacturer's instructions and luminescence detected using an EnSight plate reader (PerkinElmer).

#### Statistical analysis

Data were graphically presented using GraphPad Prism (GraphPad Software) and statistically analyzed using unpaired t tests, with a p value  $< 0.05$  indicating statistical significance. Graphs display the mean of at least  $n = 3 \pm$  standard error of the mean (SEM).

#### DATA AVAILABILITY STATEMENT

Raw data, relating to the hits described, are available upon request.

#### SUPPLEMENTAL INFORMATION

Supplemental information can be found online at <https://doi.org/10.1016/j.omtn.2022.08.037>.

#### ACKNOWLEDGMENTS

The authors thank Darling Rojas-Canales for providing valuable experimental advice and Shashikanth Marri for bioinformatics support. We thank members of the Victorian Centre for Functional Genomics at Peter MacCallum Cancer Centre for screen support. This project was generously supported by grants from Flinders Foundation and Tour de Cure, Australia. It was also undertaken with the financial support of Cancer Council's Beat Cancer Project on behalf of its donors and the South Australian State Government through the Department of Health. The Victorian Centre for Functional Genomics

(K.J.S.) is funded by the Australian Cancer Research Foundation (ACRF), Phenomics Australia (PA) through funding from the Australian Government's National Collaborative Research Infrastructure Strategy (NCRIS) program, the Peter MacCallum Cancer Centre Foundation, and the University of Melbourne Research Collaborative Infrastructure Program (MCRIP). The funding agencies had no role in the design of the study; in the collection, analyses, or interpretation of data; in the writing of the manuscript; or in the decision to publish the results.

## AUTHOR CONTRIBUTIONS

Concept, S.R.A., K.J.H., R.M., and M.Z.M.; methodology, S.R.A., K.J.H., R.M., K.J.S., and M.Z.M.; software, S.R.A., validation, S.R.A.; formal analysis, S.R.A. and K.J.H.; investigation, S.R.A. and K.J.H.; resources, M.Z.M. and R.A.M.; writing – original draft preparation, S.R.A.; writing – review & editing, R.M., M.Z.M., K.J.S., K.J.H., and R.A.M.; visualization, S.R.A.; supervision, M.Z.M., R.M., and R.A.M.; project administration, S.R.A. and M.Z.M.; funding acquisition, M.Z.M. and R.A.M. All authors have read and agreed to the published version of the manuscript.

## DECLARATION OF INTERESTS

The authors declare no competing interests.

## REFERENCES

- Bray, F., Ferlay, J., Soerjomataram, I., Siegel, R.L., Torre, L.A., and Jemal, A. (2018). Global cancer statistics 2018: GLOBOCAN estimates of incidence and mortality worldwide for 36 cancers in 185 countries. *CA Cancer J Clin.* 68, 394–424. <https://doi.org/10.3322/caac.21492>.
- Hagggar, F.A., and Boushey, R.P. (2009). Colorectal cancer epidemiology: incidence, mortality, survival, and risk factors. *Clin. Colon Rectal Surg.* 22, 191–197. <https://doi.org/10.1055/s-0029-1242458>.
- Danese, E., and Montagnana, M. (2017). Epigenetics of colorectal cancer: emerging circulating diagnostic and prognostic biomarkers. *Ann. Transl. Med.* 5, 279. <https://doi.org/10.21037/atm.2017.04.45>.
- Lao, V.V., and Grady, W.M. (2011). Epigenetics and colorectal cancer. *Nat. Rev. Gastroenterol. Hepatol.* 8, 686–700. <https://doi.org/10.1038/nrgastro.2011.173>.
- Tse, J.W.T., Jenkins, L.J., Chionh, F., and Mariadason, J.M. (2017). Aberrant DNA methylation in colorectal cancer: what should we target? *Trends Cancer* 3, 698–712. <https://doi.org/10.1016/j.trecan.2017.08.003>.
- Cummings, J.H., Pomare, E.W., Branch, W.J., Naylor, C.P., and Macfarlane, G.T. (1987). Short chain fatty acids in human large intestine, portal, hepatic and venous blood. *Gut* 28, 1221–1227. <https://doi.org/10.1136/gut.28.10.1221>.
- Davie, J.R. (2003). Inhibition of histone deacetylase activity by butyrate. *J. Nutr.* 133, 2485S–2493S.
- Donohoe, D.R., Collins, L.B., Wali, A., Bigler, R., Sun, W., and Bultman, S.J. (2012). The warburg effect dictates the mechanism of butyrate mediated histone acetylation and cell proliferation. *Mol. Cell* 48, 612–626. <https://doi.org/10.1016/j.molcel.2012.08.033>.
- Fung, K.Y., Cosgrove, L., Lockett, T., Head, R., and Topping, D.L. (2012). A review of the potential mechanisms for the lowering of colorectal oncogenesis by butyrate. *Br. J. Nutr.* 108, 820–831. <https://doi.org/10.1017/S0007114512001948>.
- Daly, K., and Shirazi-Beechey, S.P. (2006). Microarray analysis of butyrate regulated genes in colonic epithelial cells. *DNA Cell Biol.* 25, 49–62. <https://doi.org/10.1089/dna.2006.25.49>.
- Mariadason, J.M. (2008). HDACs and HDAC inhibitors in colon cancer. *Epigenetics* 3, 28–37.
- Cummins, J.M., He, Y., Leary, R.J., Pagliarini, R., Diaz, L.A., Jr., Sjoblom, T., Barad, O., Bentwich, Z., Szafarska, A.E., Labourier, E., et al. (2006). The colorectal microRNAome. *Proc. Natl. Acad. Sci. USA* 103, 3687–3692. <https://doi.org/10.1073/pnas.0511155103>.
- Lee, Y.S., and Dutta, A. (2009). MicroRNAs in cancer. *Annu. Rev. Pathol.* 4, 199–227. <https://doi.org/10.1146/annurev.pathol.4.110807.092222>.
- Peng, Y., and Croce, C.M. (2016). The role of MicroRNAs in human cancer. *Signal Transduct. Target Ther.* 1, 15004. <https://doi.org/10.1038/sigtrans.2015.4>.
- Hu, S., Dong, T.S., Dalal, S.R., Wu, F., Bissonnette, M., Kwon, J.H., and Chang, E.B. (2011). The microbe-derived short chain fatty acid butyrate targets miRNA-dependent p21 gene expression in human colon cancer. *PLoS One* 6, e16221. <https://doi.org/10.1371/journal.pone.0016221>.
- Concepcion, C.P., Bonetti, C., and Ventura, A. (2012). The microRNA-17-92 family of microRNA clusters in development and disease. *Cancer J.* 18, 262–267. <https://doi.org/10.1097/PPO.0b013e318258b60a>.
- Diosdado, B., van de Wiel, M.A., Terhaar Sive Droste, J.S., Mongera, S., Postma, C., Meijerink, W.J., Carvalho, B., and Meijer, G.A. (2009). MiR-17-92 cluster is associated with 13q gain and c-myc expression during colorectal adenoma to adenocarcinoma progression. *Br. J. Cancer* 101, 707–714. <https://doi.org/10.1038/sj.bjc.6605037>.
- Humphreys, K.J., Cobiac, L., Le Leu, R.K., Van der Hoek, M.B., and Michael, M.Z. (2013). Histone deacetylase inhibition in colorectal cancer cells reveals competing roles for members of the oncogenic miR-17-92 cluster. *Mol. Carcinog.* 52, 459–474. <https://doi.org/10.1002/mc.21879>.
- Humphreys, K.J., McKinnon, R.A., and Michael, M.Z. (2014). miR-18a inhibits CDC42 and plays a tumour suppressor role in colorectal cancer cells. *PLoS One* 9, e112288. <https://doi.org/10.1371/journal.pone.0112288>.
- Ali, S.R., Orang, A., Marri, S., McKinnon, R.A., Meech, R., and Michael, M.Z. (2021). Integrative transcriptomic network analysis of butyrate treated colorectal cancer cells. *Cancers* 13. <https://doi.org/10.3390/cancers13040636>.
- Ahmed, D., Eide, P.W., Eilertsen, I.A., Danielsen, S.A., Eknaes, M., Hektoen, M., Lind, G.E., and Lothe, R.A. (2013). Epigenetic and genetic features of 24 colon cancer cell lines. *Oncogenesis* 2, e71. <https://doi.org/10.1038/oncsis.2013.35>.
- Whitehead, R.H., Macrae, F.A., St John, D.J., and Ma, J. (1985). A colon cancer cell line (LIM1215) derived from a patient with inherited nonpolyposis colorectal cancer. *J. Natl. Cancer Inst.* 74, 759–765.
- Polakis, P. (2000). Wnt signaling and cancer. *Genes Dev.* 14, 1837–1851. <https://doi.org/10.1101/gad.14.15.1837>.
- Ilyas, M., Tomlinson, I.P., Rowan, A., Pignatelli, M., and Bodmer, W.F. (1997). Beta-catenin mutations in cell lines established from human colorectal cancers. *Proc. Natl. Acad. Sci. USA* 94, 10330–10334. <https://doi.org/10.1073/pnas.94.19.10330>.
- Dang, D.T., Mahatan, C.S., Dang, L.H., Agboola, I.A., and Yang, V.W. (2001). Expression of the gut-enriched Kruppel-like factor (Kruppel-like factor 4) gene in the human colon cancer cell line RKO is dependent on CDX2. *Oncogene* 20, 4884–4890. <https://doi.org/10.1038/sj.onc.1204645>.
- Gong, X.Y., and Huang, A.L. (2020). Regulatory roles of miR-593 in the proliferation and invasion of human hepatic carcinoma. *Eur. Rev. Med. Pharmacol. Sci.* 24, 6657–6664. [https://doi.org/10.26355/eurev.202006\\_21652](https://doi.org/10.26355/eurev.202006_21652).
- Wei, F., Wang, M., Li, Z., Wang, Y., and Zhou, Y. (2019). miR-593 inhibits proliferation and invasion and promotes apoptosis in non-small cell lung cancer cells by targeting SLUG-associated signaling pathways. *Mol. Med. Rep.* 20, 5172–5182. <https://doi.org/10.3892/mmr.2019.10776>.
- Huang, Q., Peng, L., Sun, Y., Huang, J., Han, T., Li, Y., and Peng, H. (2021). miR-593-3p promotes proliferation and invasion in prostate cancer cells by targeting ADIPOR1. *OncoTargets Ther.* 14, 3729–3737. <https://doi.org/10.2147/OTT.S310198>.
- Chi, J., Liu, S., Wu, Z., Shi, Y., Shi, C., Zhang, T., Xiong, B., Zeng, Y., and Dong, X. (2021). circNSUN2 promotes the malignant biological behavior of colorectal cancer cells via the miR-181a-5p/ROCK2 axis. *Oncol. Rep.* 46. <https://doi.org/10.3892/or.2021.8093>.
- Ben-David, U., Siranosian, B., Ha, G., Tang, H., Oren, Y., Hinohara, K., Strathdee, C.A., Dempster, J., Lyons, N.J., Burns, R., et al. (2018). Genetic and transcriptional evolution alters cancer cell line drug response. *Nature* 560, 325–330. <https://doi.org/10.1038/s41586-018-0409-3>.

31. Han, P., Li, J.-w., Zhang, B.-m., Lv, J.-c., Li, Y.-m., Gu, X.-y., Yu, Z.-w., Jia, Y.-h., Bai, X.-f., Li, L., et al. (2017). The lncRNA CRNDE promotes colorectal cancer cell proliferation and chemoresistance via miR-181a-5p-mediated regulation of Wnt/ $\beta$ -catenin signaling. *Mol. Cancer* 16, 9. <https://doi.org/10.1186/s12943-017-0583-1>.
32. Hosseinalhi, N., Aghapour, M., Duijf, P.H.G., and Baradaran, B. (2018). Treating cancer with microRNA replacement therapy: a literature review. *J. Cell. Physiol.* 233, 5574–5588. <https://doi.org/10.1002/jcp.26514>.
33. van Zandwijk, N., Pavlakis, N., Kao, S.C., Linton, A., Boyer, M.J., Clarke, S., Huynh, Y., Chrzanoska, A., Fulham, M.J., Bailey, D.L., et al. (2017). Safety and activity of microRNA-loaded minicells in patients with recurrent malignant pleural mesothelioma: a first-in-man, phase 1, open-label, dose-escalation study. *Lancet Oncol.* 18, 1386–1396. [https://doi.org/10.1016/s1470-2045\(17\)30621-6](https://doi.org/10.1016/s1470-2045(17)30621-6).
34. Iacomino, G., Tecce, M.F., Grimaldi, C., Tosto, M., and Russo, G.L. (2001). Transcriptional response of a human colon adenocarcinoma cell line to sodium butyrate. *Biochem. Biophys. Res. Commun.* 285, 1280–1289. <https://doi.org/10.1006/bbrc.2001.5323>.
35. Mariadason, J.M., Corner, G.A., and Augenlicht, L.H. (2000). Genetic reprogramming in pathways of colonic cell maturation induced by short chain fatty acids: comparison with trichostatin A, sulindac, and curcumin and implications for chemoprevention of colon cancer. *Cancer Res.* 60, 4561–4572.
36. Tailor, D., Hahm, E.-R., Kale, R.K., Singh, S.V., and Singh, R.P. (2014). Sodium butyrate induces DRP1-mediated mitochondrial fusion and apoptosis in human colorectal cancer cells. *Mitochondrion* 16, 55–64. <https://doi.org/10.1016/j.mito.2013.10.004>.
37. Saldanha, S.N., Kala, R., and Tollefsbol, T.O. (2014). Molecular mechanisms for inhibition of colon cancer cells by combined epigenetic-modulating epigallocatechin gallate and sodium butyrate. *Exp. Cell Res.* 324, 40–53. <https://doi.org/10.1016/j.yexcr.2014.01.024>.
38. Siavoshian, S., Segain, J.P., Kornprobst, M., Bonnet, C., Cherbut, C., Galmiche, J.P., and Blottiere, H.M. (2000). Butyrate and trichostatin A effects on the proliferation/differentiation of human intestinal epithelial cells: induction of cyclin D3 and p21 expression. *Gut* 46, 507–514.
39. Shen, H., Weng, X.-D., Liu, X.-H., Yang, D., Wang, L., Guo, J., Wang, M., Wang, X., and Diao, C.-H. (2018). miR-181a-5p is downregulated and inhibits proliferation and the cell cycle in prostate cancer. *Int. J. Clin. Exp. Pathol.* 11, 3969–3976.
40. Yu, J., Qi, J., Sun, X., Wang, W., Wei, G., Wu, Y., Gao, Q., and Zheng, J. (2018). MicroRNA181a promotes cell proliferation and inhibits apoptosis in gastric cancer by targeting RASSF1A. *Oncol. Rep.* 40, 1959–1970. <https://doi.org/10.3892/or.2018.6632>.
41. Chimpoy, K., Diaz, G.D., Li, Q., Carter, O., Dashwood, W.-M., Mathews, C.K., Williams, D.E., Bailey, G.S., and Dashwood, R.H. (2009). E2F4 and ribonucleotide reductase mediate S-phase arrest in colon cancer cells treated with chlorophyllin. *Int. J. Cancer* 125, 2086–2094. <https://doi.org/10.1002/ijc.24559>.
42. Kang, K., Oh, S.H., Yun, J.H., Jho, E.H., Kang, J.H., Batsuren, D., Tunsag, J., Park, K.H., Kim, M., and Nho, C.W. (2011). A novel topoisomerase inhibitor, daurinol, suppresses growth of HCT116 cells with low hematological toxicity compared to etoposide. *Neoplasia* 13, 1043–1057. <https://doi.org/10.1593/neo.11972>.
43. Zhang, X., Ma, X., An, H., Xu, C., Cao, W., Yuan, W., and Ma, J. (2017). Upregulation of microRNA-125b by G-CSF promotes metastasis in colorectal cancer. *Oncotarget* 8, 50642–50654. <https://doi.org/10.18632/oncotarget.16892>.
44. Liu, Y., Beyer, A., and Aebersold, R. (2016). On the dependency of cellular protein levels on mRNA abundance. *Cell* 165, 535–550. <https://doi.org/10.1016/j.cell.2016.03.014>.
45. Payne, S.H. (2015). The utility of protein and mRNA correlation. *Trends Biochem. Sci.* 40, 1–3. <https://doi.org/10.1016/j.tibs.2014.10.010>.
46. Vogel, C., and Marcotte, E.M. (2012). Insights into the regulation of protein abundance from proteomic and transcriptomic analyses. *Nat. Rev. Genet.* 13, 227–232. <https://doi.org/10.1038/nrg3185>.
47. Schwanhauser, B., Busse, D., Li, N., Dittmar, G., Schuchhardt, J., Wolf, J., Chen, W., and Selbach, M. (2011). Global quantification of mammalian gene expression control. *Nature* 473, 337–342. <https://doi.org/10.1038/nature10098>.
48. Vogel, C., Abreu Rde, S., Ko, D., Le, S.Y., Shapiro, B.A., Burns, S.C., Sandhu, D., Boutz, D.R., Marcotte, E.M., and Penalva, L.O. (2010). Sequence signatures and mRNA concentration can explain two-thirds of protein abundance variation in a human cell line. *Mol. Syst. Biol.* 6, 400. <https://doi.org/10.1038/msb.2010.59>.
49. Baek, D., Villén, J., Shin, C., Camargo, F.D., Gygi, S.P., and Bartel, D.P. (2008). The impact of microRNAs on protein output. *Nature* 455, 64–71. [http://www.nature.com/nature/journal/v455/n7209/supinfo/nature07242\\_S1.html](http://www.nature.com/nature/journal/v455/n7209/supinfo/nature07242_S1.html).
50. Wang, G., Yang, X., Li, C., Cao, X., Luo, X., and Hu, J. (2014). PIK3R3 induces epithelial-to-mesenchymal transition and promotes metastasis in colorectal cancer. *Mol. Cancer Therapeut.* 13, 1837–1847. <https://doi.org/10.1158/1535-7163.MCT-14-0049>.
51. Wang, Q., Li, N., Wang, X., Kim, M.M., and Evers, B.M. (2002). Augmentation of sodium butyrate-induced apoptosis by phosphatidylinositol 3'-kinase inhibition in the KM20 human colon cancer cell line. *Clin. Cancer Res.* 8, 1940–1947.
52. Sun, J., Zhang, T., Cheng, M., Hong, L., Zhang, C., Xie, M., Sun, P., Fan, R., Wang, Z., Wang, L., and Zhong, J. (2019). TRIM29 facilitates the epithelial-to-mesenchymal transition and the progression of colorectal cancer via the activation of the Wnt/ $\beta$ -catenin signaling pathway. *J. Exp. Clin. Cancer Res.* 38, 104. <https://doi.org/10.1186/s13046-019-1098-y>.
53. Zhou, X.-M., Sun, R., Luo, D.-H., Sun, J., Zhang, M.-Y., Wang, M.-H., Yang, Y., Wang, H.-Y., and Mai, S.-J. (2016). Upregulated TRIM29 promotes proliferation and metastasis of nasopharyngeal carcinoma via PTEN/AKT/mTOR signal pathway. *Oncotarget* 7, 13634–13650. <https://doi.org/10.18632/oncotarget.7215>.
54. Dannenberg, A.J., Altorki, N.K., Boyle, J.O., Dang, C., Howe, L.R., Weksler, B.B., and Subbaramaiah, K. (2001). Cyclo-oxygenase 2: a pharmacological target for the prevention of cancer. *Lancet Oncol.* 2, 544–551. [https://doi.org/10.1016/s1470-2045\(01\)00488-0](https://doi.org/10.1016/s1470-2045(01)00488-0).
55. Ferrandez, A., Prescott, S., and Burt, R.W. (2003). COX-2 and colorectal cancer. *Curr. Pharm. Des.* 9, 2229–2251.
56. Balcerczak, E., Pasz-Walczak, G., Kumor, P., Panczyk, M., Kordek, R., Wierzbicki, R., and Mirowski, M. (2005). Cyclin D1 protein and CCND1 gene expression in colorectal cancer. *Eur. J. Surg. Oncol.* 31, 721–726. <https://doi.org/10.1016/j.ejso.2005.04.005>.
57. Rhodes, D.R., Yu, J., Shanker, K., Deshpande, N., Varambally, R., Ghosh, D., Barrette, T., Pandey, A., and Chinnaiyan, A.M. (2004). ONCOMINE: a cancer microarray database and integrated data-mining platform. *Neoplasia* 6, 1–6. [https://doi.org/10.1016/s1476-5586\(04\)80047-2](https://doi.org/10.1016/s1476-5586(04)80047-2).
58. Hong, Y., Ho, K.S., Eu, K.W., and Cheah, P.Y. (2007). A susceptibility gene set for early onset colorectal cancer that integrates diverse signaling pathways: implication for tumorigenesis. *Clin. Cancer Res.* 13, 1107–1114. <https://doi.org/10.1158/1078-0432.Ccr-06-1633>.
59. Hazawa, M., Lin, D.C., Kobayashi, A., Jiang, Y.Y., Xu, L., Dewi, F.R.P., Mohamed, M.S., Hartono, Nakada, M., Meguro-Horike, M., Horike, S.I., et al. (2018). ROCK-dependent phosphorylation of NUP62 regulates p63 nuclear transport and squamous cell carcinoma proliferation. *EMBO Rep.* 19, 73–88. <https://doi.org/10.15252/embr.201744523>.
60. Bayraktar, R., Pichler, M., Kanlikilicer, P., Ivan, C., Bayraktar, E., Kahraman, N., Aslan, B., Oguztuzun, S., Ulasli, M., Arslan, A., et al. (2017). MicroRNA 603 acts as a tumor suppressor and inhibits triple-negative breast cancer tumorigenesis by targeting elongation factor 2 kinase. *Oncotarget* 8, 11641–11658. <https://doi.org/10.18632/oncotarget.14264>.
61. Fodde, R. (2002). The APC gene in colorectal cancer. *Eur. J. Cancer* 38, 867–871. [https://doi.org/10.1016/S0959-8049\(02\)00040-0](https://doi.org/10.1016/S0959-8049(02)00040-0).
62. Lazarova, D.L., Chiaro, C., and Bordonaro, M. (2014). Butyrate induced changes in Wnt-signaling specific gene expression in colorectal cancer cells. *BMC Res. Notes* 7, 226. <https://doi.org/10.1186/1756-0500-7-226>.
63. Gao, C., and Chen, Y.G. (2010). Disvelled: the hub of Wnt signaling. *Cell. Signal.* 22, 717–727. <https://doi.org/10.1016/j.cellsig.2009.11.021>.
64. Xu, W., Xu, B., Yao, Y., Yu, X., Cao, H., Zhang, J., Liu, J., and Sheng, H. (2016). RNA interference against TRIM29 inhibits migration and invasion of colorectal cancer cells. *Oncol. Rep.* 36, 1411–1418. <https://doi.org/10.3892/or.2016.4941>.
65. Yang, X., Gu, Q., Lin, L., Li, S., Zhong, S., Li, Q., and Cui, Z. (2015). Nucleoporin 62-like protein activates canonical Wnt signaling through facilitating the nuclear import of  $\beta$ -catenin in zebrafish. *Mol. Cell. Biol.* 35, 1110–1124. <https://doi.org/10.1128/MCB.01181-14>.



66. Nunez, F., Bravo, S., Cruzat, F., Montecino, M., and De Ferrari, G.V. (2011). Wnt/ beta-catenin signaling enhances cyclooxygenase-2 (COX2) transcriptional activity in gastric cancer cells. *PLoS One* 6, e18562. <https://doi.org/10.1371/journal.pone.0018562>.
67. Tetsu, O., and McCormick, F. (1999). Beta-catenin regulates expression of cyclin D1 in colon carcinoma cells. *Nature* 398, 422–426. <https://doi.org/10.1038/18884>.
68. Song, J., Wang, Z., and Ewing, R.M. (2014). Integrated analysis of the Wnt responsive proteome in human cells reveals diverse and cell-type specific networks. *Mol. Biosyst.* 10, 45–53. <https://doi.org/10.1039/c3mb70417c>.
69. Hulin, J.A., Nguyen, T.D., Cui, S., Marri, S., Yu, R.T., Downes, M., Evans, R.M., Makarenkova, H., and Meech, R. (2016). Barx2 and Pax7 regulate Axin2 expression in myoblasts by interaction with  $\beta$ -catenin and chromatin remodelling. *Stem Cell.* 34, 2169–2182. <https://doi.org/10.1002/stem.2396>.
70. Lazarova, D.L., Bordonaro, M., Carbone, R., and Sartorelli, A.C. (2004). Linear relationship between Wnt activity levels and apoptosis in colorectal carcinoma cells exposed to butyrate. *Int. J. Cancer* 110, 523–531. <https://doi.org/10.1002/ijc.20152>.
71. Zhou, J.-Y., Chen, M., Ma, L., Wang, X., Chen, Y.-G., and Liu, S.-L. (2016). Role of CD44high/CD133high HCT-116 cells in the tumorigenesis of colon cancer. *Oncotarget* 7, 7657.
72. Lv, S.Y., Shan, T.D., Pan, X.T., Tian, Z.B., Liu, X.S., Liu, F.G., Sun, X.G., Xue, H.G., Li, X.H., Han, Y., et al. (2018). The lncRNA ZEB1-AS1 sponges miR-181a-5p to promote colorectal cancer cell proliferation by regulating Wnt/beta-catenin signaling. *Cell Cycle* 17, 1245–1254. <https://doi.org/10.1080/15384101.2018.1471317>.
73. Ji, D., Chen, Z., Li, M., Zhan, T., Yao, Y., Zhang, Z., Xi, J., Yan, L., and Gu, J. (2014). MicroRNA-181a promotes tumor growth and liver metastasis in colorectal cancer by targeting the tumor suppressor WIF-1. *Mol. Cancer* 13, 86. <https://doi.org/10.1186/1476-4598-13-86>.
74. Birmingham, A., Selfors, L.M., Forster, T., Wrobel, D., Kennedy, C.J., Shanks, E., Santoyo-Lopez, J., Dunican, D.J., Long, A., Kelleher, D., et al. (2009). Statistical methods for analysis of high-throughput RNA interference screens. *Nat. Methods* 6, 569–575. <https://doi.org/10.1038/nmeth.1351>.
75. Malo, N., Hanley, J.A., Cerquozzi, S., Pelletier, J., and Nadon, R. (2006). Statistical practice in high-throughput screening data analysis. *Nat. Biotechnol.* 24, 167–175. <https://doi.org/10.1038/nbt1186>.
76. Cao, S.S., and Zhen, Y.S. (1989). Potentiation of antimetabolite antitumor activity in vivo by dipyridamole and amphotericin B. *Cancer Chemother. Pharmacol.* 24, 181–186.
77. Dweep, H., Sticht, C., Pandey, P., and Gretz, N. (2011). miRWalk–database: prediction of possible miRNA binding sites by "walking" the genes of three genomes. *J. Biomed. Inf.* 44, 839–847. <https://doi.org/10.1016/j.jbi.2011.05.002>.
78. Maragkakis, M., Reczko, M., Simossis, V.A., Alexiou, P., Papadopoulos, G.L., Dalamagas, T., Giannopoulos, G., Goumas, G., Koukis, E., Kourtis, K., et al. (2009). DIANA-microT web server: elucidating microRNA functions through target prediction. *Nucleic Acids Res.* 37, W273–W276. <https://doi.org/10.1093/nar/gkp292>.
79. Enright, A., John, B., Gaul, U., Tuschl, T., Sander, C., and Marks, D. (2003). MicroRNA targets in *Drosophila*. *Genome Biol.* 5, R1.
80. John, B., Enright, A.J., Aravin, A., Tuschl, T., Sander, C., and Marks, D.S. (2004). Human MicroRNA targets. *PLoS Biol.* 2, e363. <https://doi.org/10.1371/journal.pbio.0020363>.
81. Wang, X. (2008). miRDB: a microRNA target prediction and functional annotation database with a wiki interface. *Rna* 14, 1012–1017. <https://doi.org/10.1261/rna.965408>.
82. Krek, A., Grun, D., Poy, M.N., Wolf, R., Rosenberg, L., Epstein, E.J., MacMenamin, P., da Piedade, I., Gunsalus, K.C., Stoffel, M., and Rajewsky, N. (2005). Combinatorial microRNA target predictions. *Nat. Genet.* 37, 495–500. <https://doi.org/10.1038/ng1536>.
83. Kertesz, M., Iovino, N., Unnerstall, U., Gaul, U., and Segal, E. (2007). The role of site accessibility in microRNA target recognition. *Nat. Genet.* 39, 1278–1284. [http://www.nature.com/ng/journal/v39/n10/supinfo/ng2135\\_S1.html](http://www.nature.com/ng/journal/v39/n10/supinfo/ng2135_S1.html).
84. Miranda, K.C., Huynh, T., Tay, Y., Ang, Y.S., Tam, W.L., Thomson, A.M., Lim, B., and Rigoutsos, I. (2006). A pattern-based method for the identification of MicroRNA binding sites and their corresponding heteroduplexes. *Cell* 126, 1203–1217. <https://doi.org/10.1016/j.cell.2006.07.031>.
85. Lewis, B.P., Burge, C.B., and Bartel, D.P. (2005). Conserved seed pairing, often flanked by adenosines, indicates that thousands of human genes are microRNA targets. *Cell* 120, 15–20. <https://doi.org/10.1016/j.cell.2004.12.035>.
86. Ge, S.X., Jung, D., and Yao, R. (2020). ShinyGO: a graphical gene-set enrichment tool for animals and plants. *Bioinformatics* 36, 2628–2629. <https://doi.org/10.1093/bioinformatics/btz931>.
87. Kanehisa, M., Furumichi, M., Tanabe, M., Sato, Y., and Morishima, K. (2017). KEGG: new perspectives on genomes, pathways, diseases and drugs. *Nucleic Acids Res.* 45, D353–d361. <https://doi.org/10.1093/nar/gkx1092>.



OMTN, Volume 30

## **Supplemental information**

### **Functional high-throughput screen identifies microRNAs that promote butyrate-induced death in colorectal cancer cells**

**Saira R. Ali, Karen J. Humphreys, Kaylene.J. Simpson, Ross A. McKinnon, Robyn Meech, and Michael Z. Michael**

## Supplemental data

**Table S1. List of miRNA mimic screen hits that reduced HCT116 cell proliferation and induced cell apoptosis with or without butyrate.**

| MicroRNA mimic | Normalised viability (mimic vs NC) 0 mM butyrate |      | Normalised viability (mimic vs NC) 2.5 mM butyrate |      | Normalised caspase activity (mimic vs NC) 0 mM butyrate | Z-score (caspase activity) | Normalised caspase activity (mimic vs NC) 2.5 mM butyrate |      | Average fold change ratio (caspase activity) |
|----------------|--------------------------------------------------|------|----------------------------------------------------|------|---------------------------------------------------------|----------------------------|-----------------------------------------------------------|------|----------------------------------------------|
|                | CV1                                              | 0.8  | CV2                                                | 0.71 |                                                         |                            | 2.1                                                       | 2.59 |                                              |
| miR-29b-2-5p   | CV1                                              | 0.8  | CV2                                                | 0.71 | 1.31                                                    | 0.3                        | 2.1                                                       | 2.59 | 1.6                                          |
| miR-125b-1-3p  | CV1                                              | 0.88 | CV2                                                | 0.74 | 1.43                                                    | 0.6                        | 1.66                                                      | 1.45 | 1.16                                         |
| miR-181a-5p    | CV1                                              | 0.84 | CV2                                                | 0.78 | 1.27                                                    | 0.2                        | 1.7                                                       | 1.56 | 1.34                                         |
| miR-509-5p     | CV1                                              | 0.86 | CV2                                                | 0.69 | 1.5                                                     | 0.77                       | 1.75                                                      | 1.69 | 1.17                                         |
| miR-593-3p     | CV1                                              | 0.88 | CV2                                                | 0.76 | 1.23                                                    | 0.1                        | 1.48                                                      | 0.99 | 1.2                                          |
| miR-1227-3p    | CV1                                              | 0.82 | CV2                                                | 0.74 | 1.66                                                    | 1.17                       | 2.04                                                      | 2.44 | 1.23                                         |
| miR-1231       | CV1                                              | 0.85 | CV2                                                | 0.73 | 2.97                                                    | 4.45                       | 2.19                                                      | 2.83 | 0.74                                         |
| miR-1256       | CV1                                              | 0.91 | CV2                                                | 0.77 | 1.94                                                    | 1.87                       | 1.9                                                       | 2.08 | 0.98                                         |
| miR-1265       | CV1                                              | 0.84 | CV2                                                | 0.76 | 1.5                                                     | 0.77                       | 1.92                                                      | 2.13 | 1.28                                         |
| miR-3151       | CV1                                              | 0.88 | CV2                                                | 0.7  | 4.02                                                    | 7.07                       | 2                                                         | 2.33 | 0.5                                          |
| miR-3179       | CV1                                              | 0.8  | CV2                                                | 0.55 | 2.57                                                    | 3.45                       | 2.19                                                      | 2.83 | 0.85                                         |
| miR-3654       | CV1                                              | 0.82 | CV2                                                | 0.67 | 3.16                                                    | 4.92                       | 1.88                                                      | 2.02 | 0.59                                         |
| miR-4252       | CV1                                              | 0.92 | CV2                                                | 0.64 | 1.21                                                    | 0.05                       | 1.58                                                      | 1.25 | 1.31                                         |

**Table S2. Coefficient of drug interaction values for miRNA and butyrate interactions for xCELLigence proliferation data.**

Coefficient of drug interaction values were calculated as described in the methods section. CDI <1, = 1 or >1 indicates that when the miRNA mimic and butyrate combined, they behave synergistically, additively or antagonistically, respectively. CDI <0.7 indicates that the drug is significantly synergistic.

| miRNA         | CDI value | Classification            |
|---------------|-----------|---------------------------|
| miR-29b-2-5p  | 0.61      | Significantly synergistic |
| miR-125b-1-3p | 0.40      | Significantly synergistic |
| miR-181a-5p   | 0.43      | Significantly synergistic |
| miR-509-5p    | 0.53      | Significantly synergistic |
| miR-593-3p    | 0.92      | Synergistic               |
| miR-1227-3p   | 0.19      | Significantly synergistic |
| miR-1231      | 0.73      | Synergistic               |
| miR-1256      | 0.52      | Significantly synergistic |
| miR-1265      | 0.50      | Significantly synergistic |
| miR-3151      | 0.76      | Synergistic               |
| miR-3179      | 0.46      | Significantly synergistic |
| miR-3654      | 0.54      | Significantly synergistic |
| miR-4252      | 0.72      | Synergistic               |

**Table S3. Primer sequences**

|                |                                |                                      |
|----------------|--------------------------------|--------------------------------------|
| ACTNB Forward  | 5' TTGCCGACAGGATGCAGAAG 3'     | Sigma–Aldrich, Missouri, USA         |
| ACTNB Reverse  | 5' GCCGATCCACACGGAGTACT 3'     |                                      |
| B2M Forward    | 5' GCCGTGTGAACCATGTGACTTT 3'   | GeneWorks Thebarton, South Australia |
| B2M Reverse    | 5' CCAAATGCGGCATCTTCAA 3'      |                                      |
| CCND1 Forward  | 5' GATCAAGTGTGACCCGGACTG 3'    |                                      |
| CCND1 Reverse  | 5' CCTTGGGGTCCATGTTCTGC 3'     |                                      |
| COX2 Forward   | 5' GCTGTTCCCACCCATGTCAA3'      |                                      |
| COX2 Reverse   | 5' AAATTCCGGTGTGAGCAGT 3'      |                                      |
| DVL3 Forward   | 5' TGGACGACGATTTCCGAGTG 3'     |                                      |
| DVL3 Reverse   | 5' GCTCCGATGGGTATCAGCA 3'      |                                      |
| EEF2K Forward  | 5' CAGCTCTGGACGGGTATGTG 3'     |                                      |
| EEF2K Reverse  | 5' CCCCAAAATGGACTTCCCCGA 3'    |                                      |
| FZD4 Forward   | 5' AACGTGACCAAGATGCCCAA 3'     |                                      |
| FZD4 Reverse   | 5' TAAACAGAACAAAGGAAGAACTGC 3' |                                      |
| GAPDH Forward  | 5' TGCACCACCAACTGCTTAGC 3'     |                                      |
| GAPDH Reverse  | 5' GGCATGGACTGTGGTCATGAG 3'    |                                      |
| NUP62 Forward  | 5' TTCTCTGTTGCAGAAACCCAC 3'    |                                      |
| NUP62 Reverse  | 5' GCCTTGGGAAGATTTCCGTC 3'     |                                      |
| PIK3R3 Forward | 5' CTTGCTGCTCTGTGGCCGAT 3'     |                                      |
| PIK3R3 Reverse | 5' TGGAGCACTAGCTCCTCAGA 3'     |                                      |
| TRIM29 Forward | 5' GCCACGTTGAGAAGATGTGC 3'     |                                      |
| TRIM29 Reverse | 5' GATGGTCACCACCGTTCTCC 3'     |                                      |

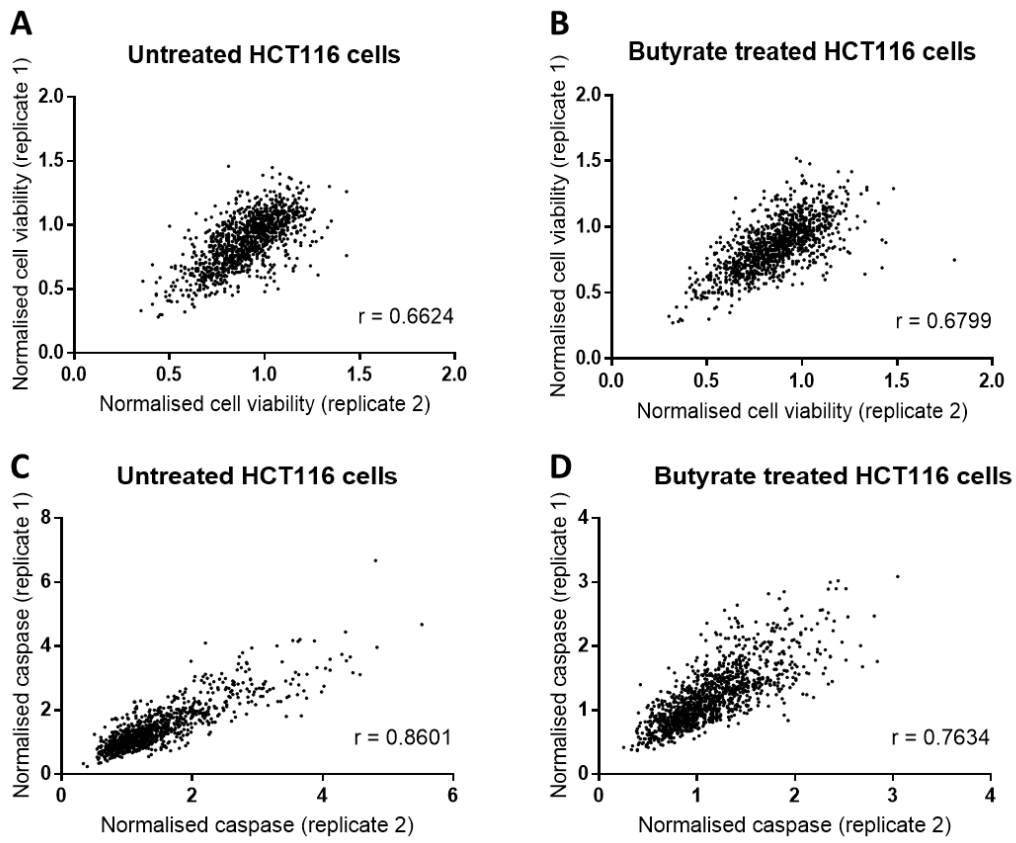

**Figure S1. Correlation analysis between replicates of the functional miRNA screen**

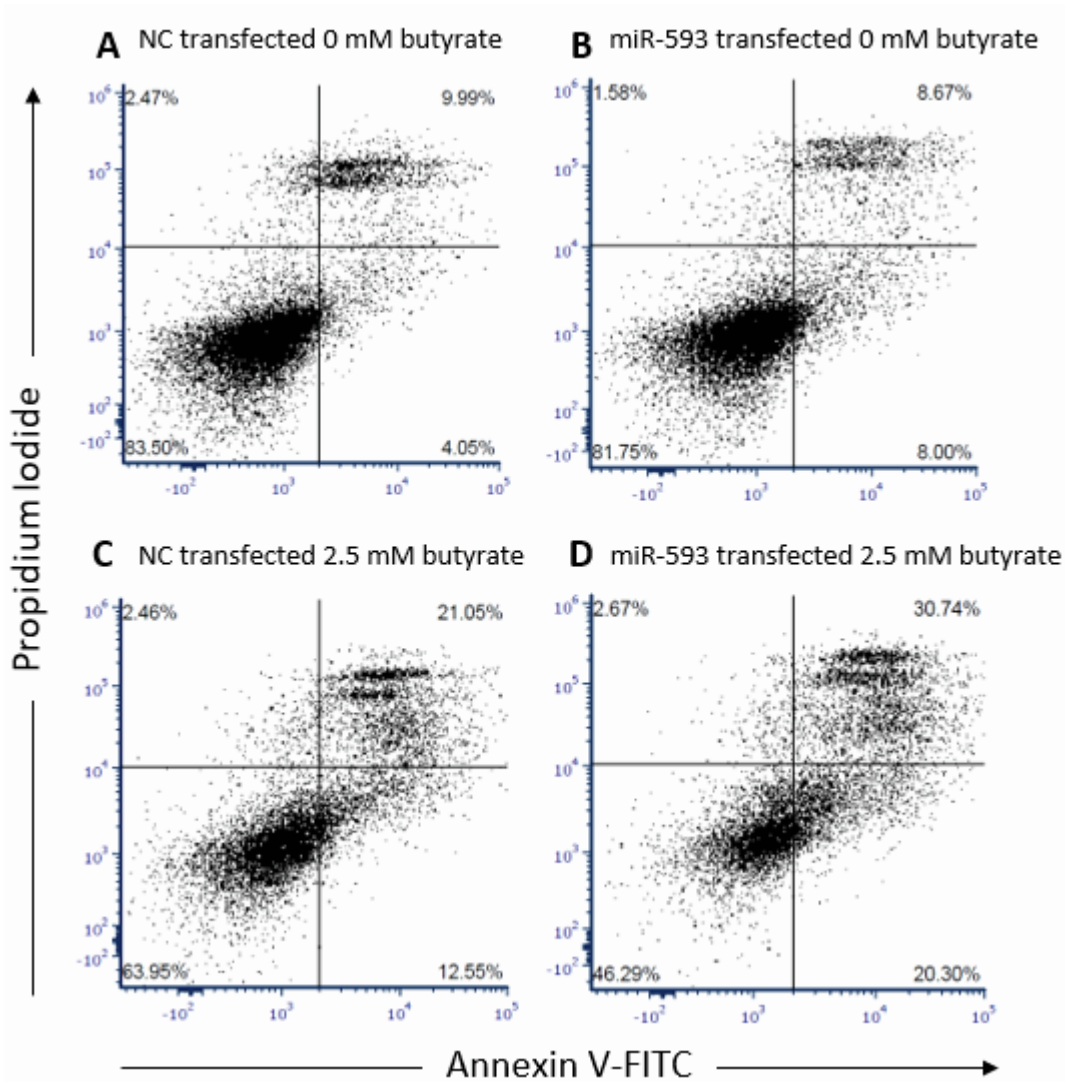

**Figure S2. Flow cytometry analysis of apoptosis in miRNA transfected HCT116 cells after 24 h of butyrate treatment.** Examples of flow charts depicting the apoptosis analyses of HCT116 cells reverse transfected with NC or miRNA mimics for 48 h, followed by 24 h of treatment with 0 mM or 2.5 mM butyrate, over a 72 h post-transfection period (A) NC transfected 0 mM butyrate, (B) miR-593 transfected 0 mM butyrate, (C) NC transfected 2.5 mM butyrate, (D) miR-593 transfected 2.5 mM butyrate. Cells were stained with propidium iodide and annexin V stain and measured using the Cytoflex Flow Cytometer. NC= Negative Control mimic.

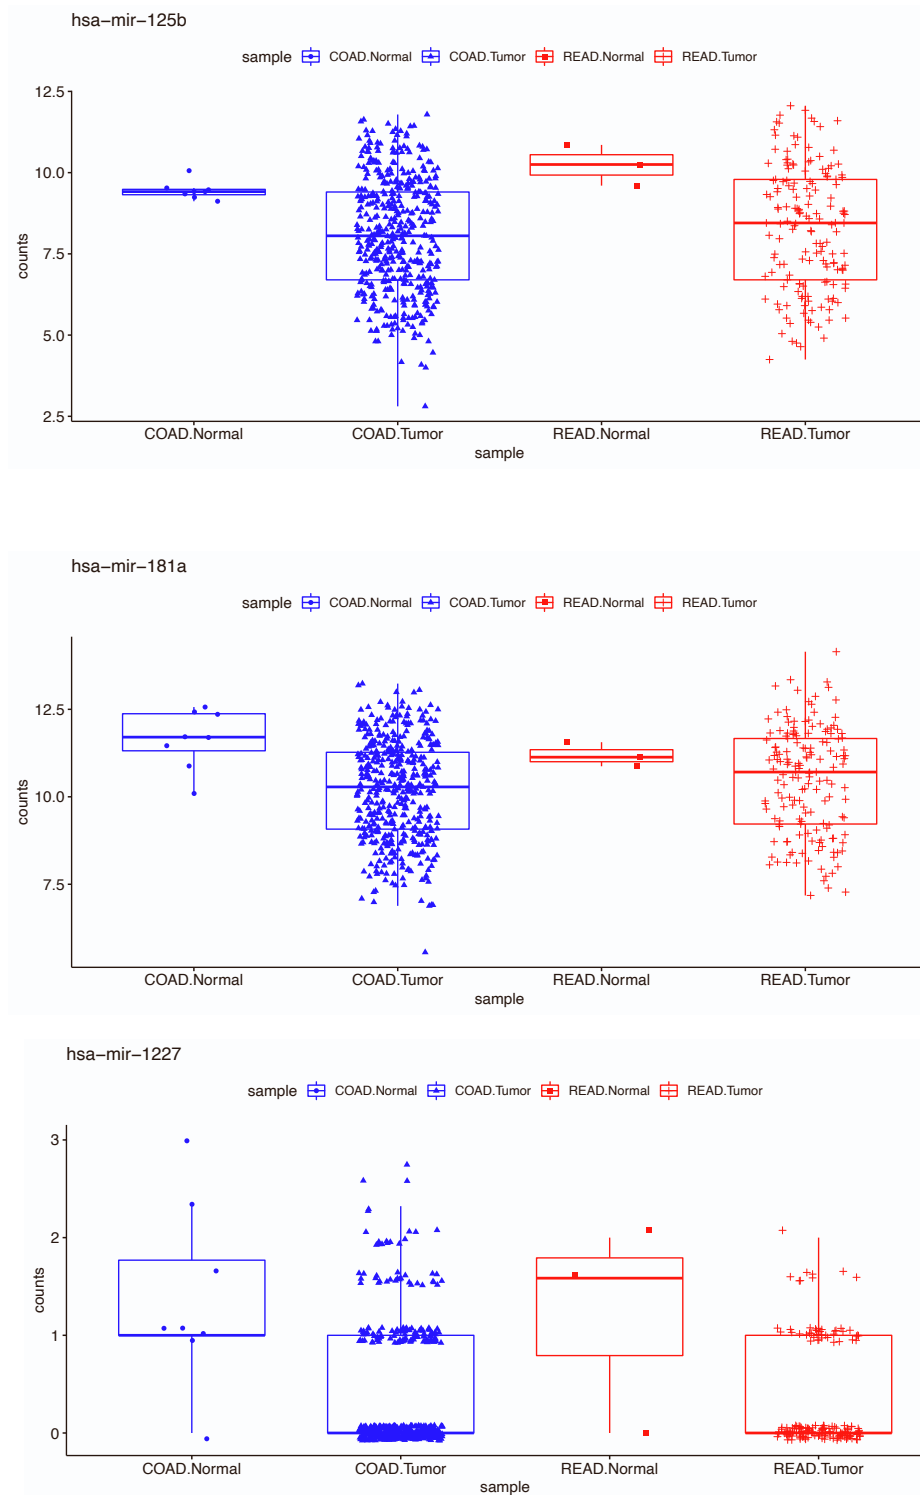

**Figure S3. MicroRNA levels in colon and rectal adenocarcinomas compared with normal epithelium.** MicroRNA Expression (Quantification tables) for colon adenocarcinoma (COAD) and rectal adenocarcinoma (READ) in TCGA datasets (The Cancer Genome Atlas Network, *Nature*, 2012, 487:330-337) were investigated using the TCGAbiolinks R package in Bioconductor. Differential expression was analysed using edgeR and log2 normalized counts were used to generate the plots. TCGA-COAD: normal n=8, primary tumour n=455. TCGA-READ: normal n=3, primary tumours n=161.



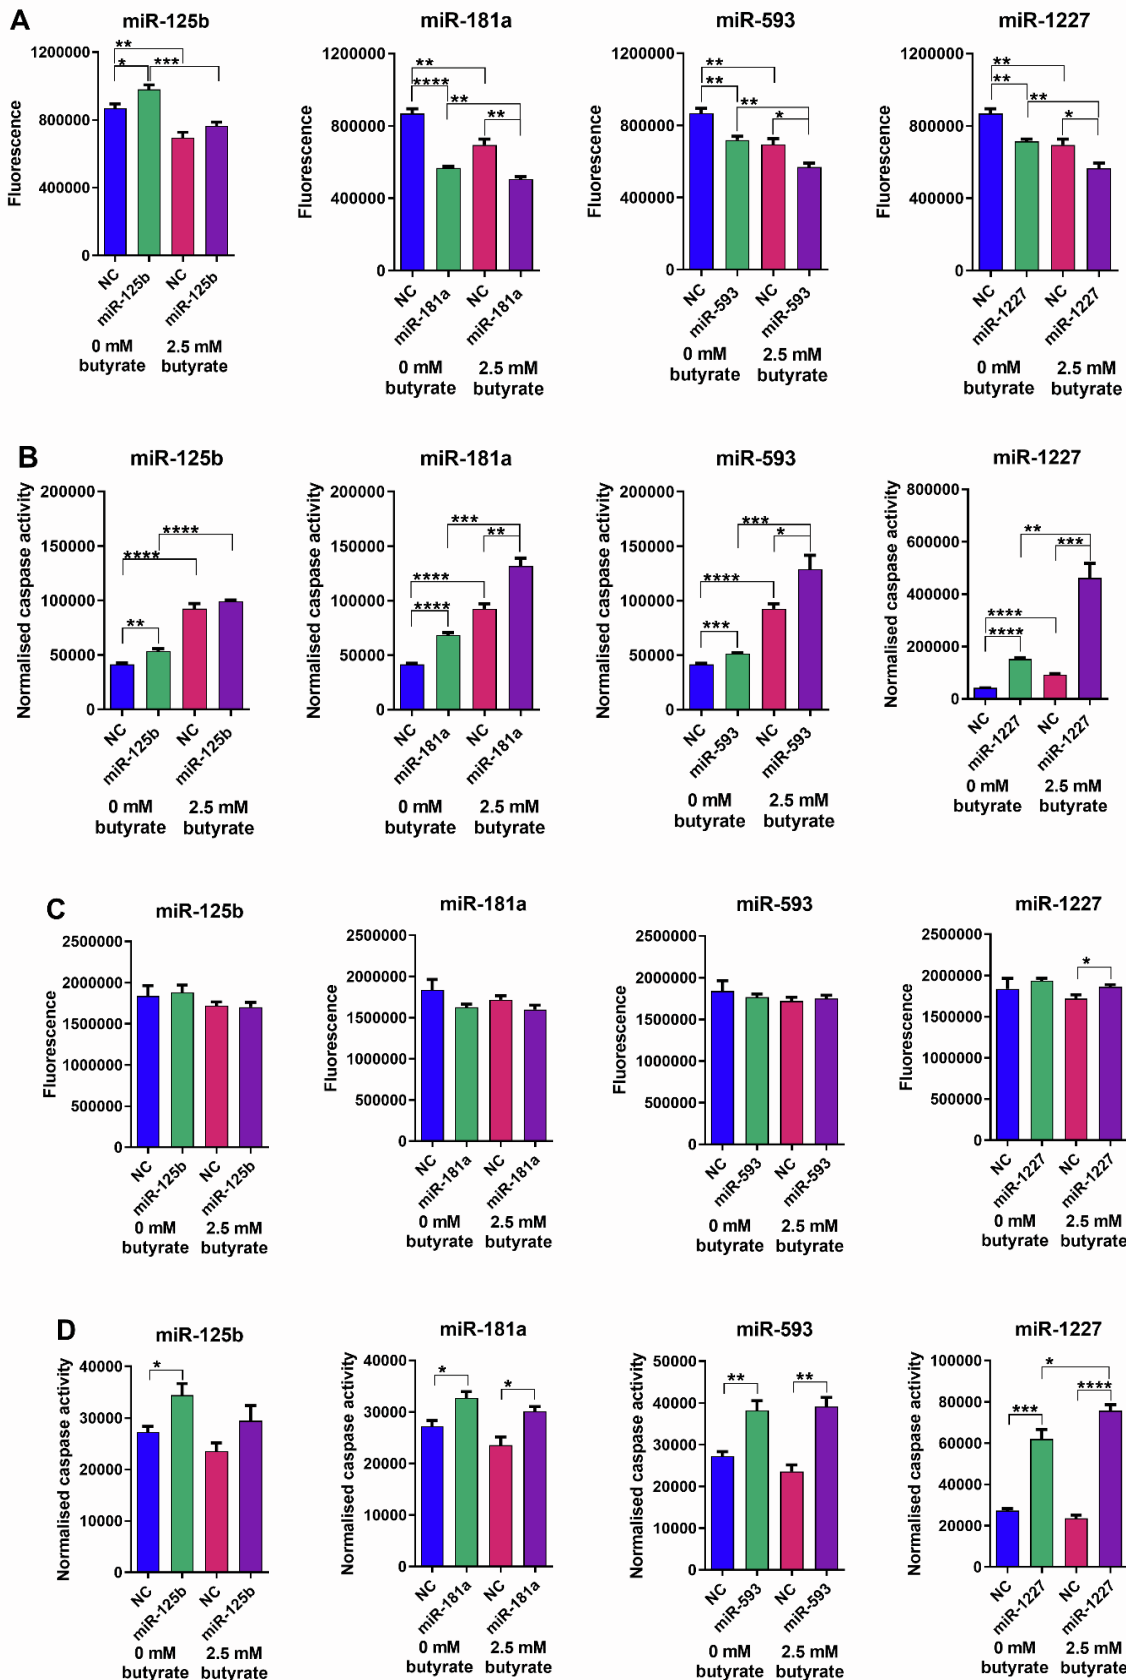

**Figure S4. Butyrate sensitising miRNAs regulate cell survival in LIM1215 (CRC) but not HFF cells.** ApoLive-Glo™ Multiplex Assay: (A, C) Fluorescence reads for viability changes and (B, D) normalised caspase activity for apoptosis changes in LIM1215 (A, B) and “normal” HFF (C, D) cells transfected with butyrate sensitising miRNAs treated with 0 mM or 2.5 mM butyrate at 48 h, over a 72 h transfection period. Statistical analysis including unpaired t-tests comparing NC (0 mM) vs. miRNA mimic (0 mM) and NC (2.5 mM) vs. miRNA mimic (2.5 mM) at 72 h post-transfection. The mean  $\pm$  SEM of  $n = 4$  is shown. Significant results are indicated by \*  $P < 0.05$ , \*\*  $P < 0.01$ , \*\*\*  $P < 0.001$ , \*\*\*\*  $P < 0.0001$ . NC= Negative Control mimic.

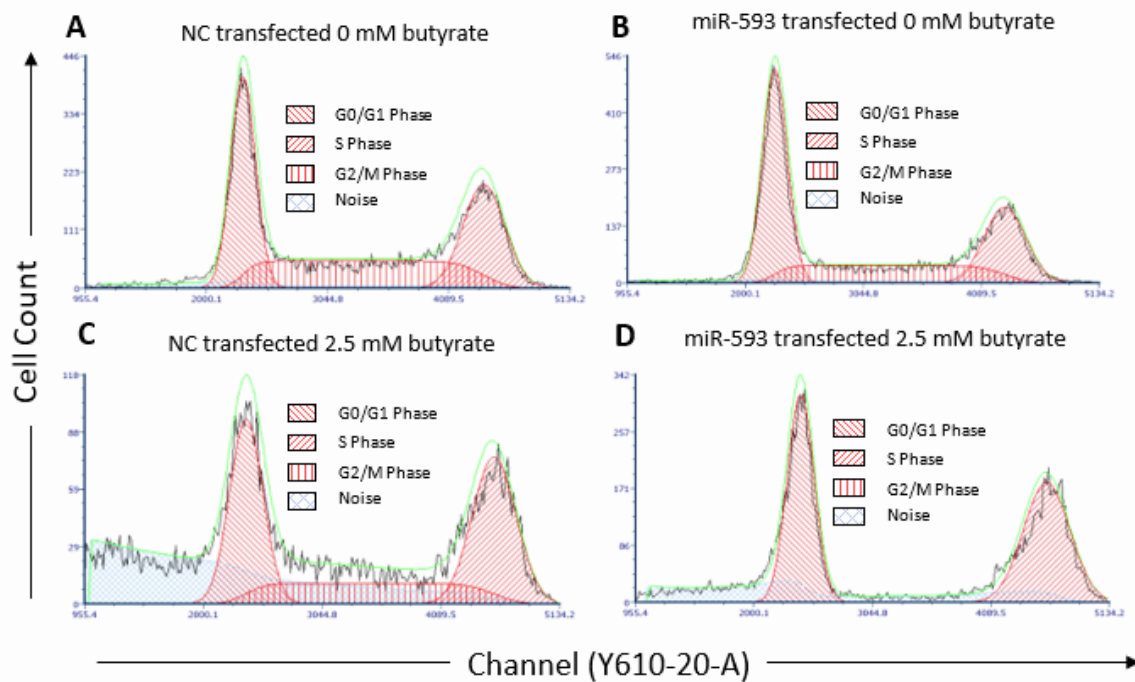

**Figure S5. Flow cytometry analysis of the cell cycle in miRNA transfected HCT116 cells after 24 h of butyrate treatment.** Examples of flow charts depicting cell cycle analyses of HCT116 cells reverse transfected with NC or miR-593 mimics for 48 h, followed by 24 h of treatment with 0 mM or 2.5 mM butyrate, over a 72 h post-transfection period (A) NC transfected 0 mM butyrate, (B) miR-593 transfected 0 mM butyrate, (C) NC transfected 2.5 mM butyrate, (D) miR-593 transfected 2.5 mM butyrate. Cells were stained with propidium iodide and measured using the Cytoflex Flow Cytometer. NC= Negative Control mimic.

**A**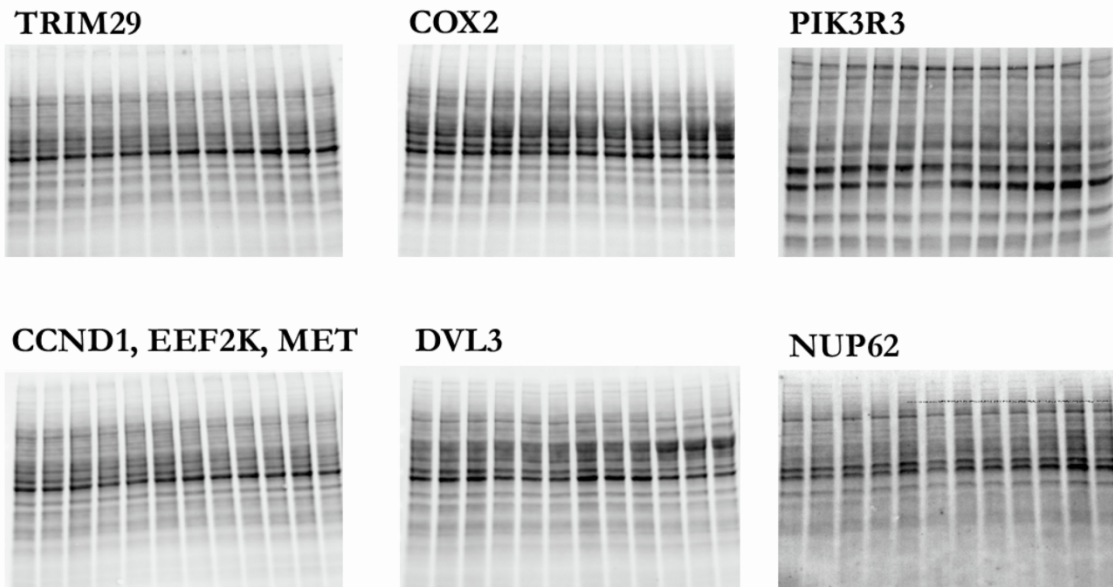**B**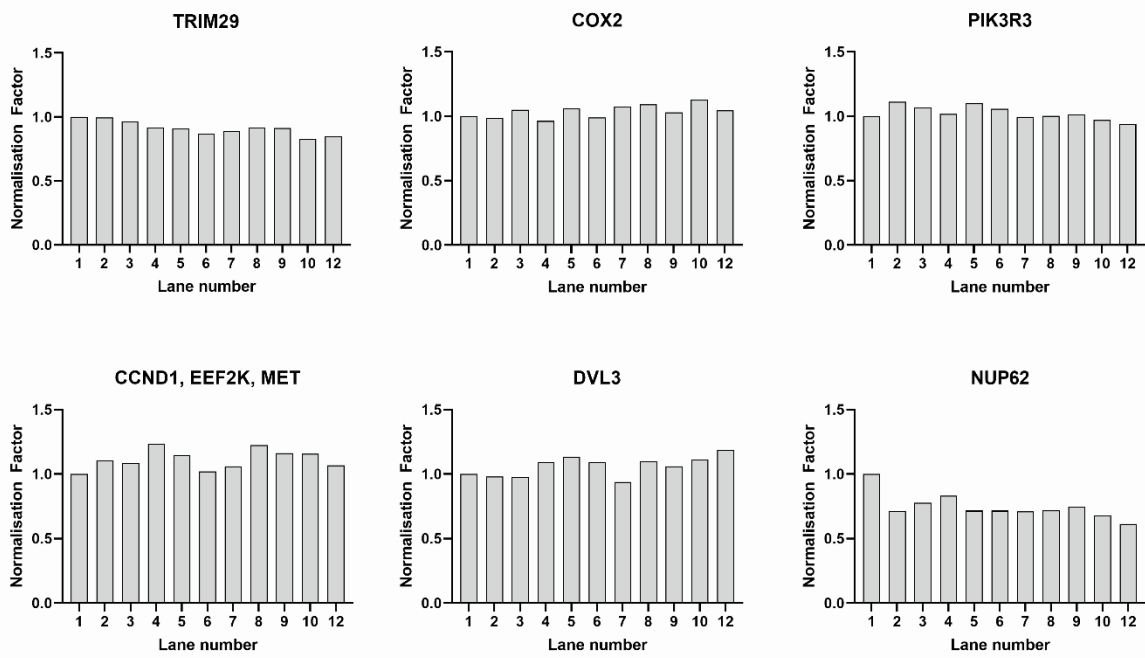

**Figure S6. Protein loading for total protein normalisation.**

(A) TGX Stain-free blots and (B) normalisation factors used to determine relative protein loading for total protein normalisation to quantify proteins in Figure 6B.
